*Belilla et al.*

# Hyperdiverse archaea near life limits at the polyextreme geothermal Dallol area

Jodie Belilla<sup>1</sup>, David Moreira<sup>1</sup>, Ludwig Jardillier<sup>1</sup>, Guillaume Reboul<sup>1</sup>, Karim Benzerara<sup>2</sup>, José M. López-García<sup>3</sup>, Paola Bertolino<sup>1</sup>, Ana I. López-Archilla<sup>4</sup> & Purificación López-García<sup>1\*</sup>

## Affiliations:

<sup>1</sup> Ecologie Systématique Evolution, CNRS, Université Paris-Sud, AgroParisTech, Université Paris-Saclay, Orsay, France.

<sup>2</sup> Institut de Minéralogie, de Physique des Matériaux et de Cosmochimie, CNRS, Université Pierre et Marie Curie, Muséum National d'Histoire Naturelle, IRD, Sorbonne Universités, Paris, France.

<sup>3</sup> Instituto Geológico y Minero de España, Palma de Mallorca, Spain.

<sup>4</sup> Departamento de Ecología, Universidad Autónoma de Madrid, Madrid, Spain

\*Correspondence to: [puri.lopez@u-psud.fr](mailto:puri.lopez@u-psud.fr)

## Abstract:

Microbial life has adapted to various individual extreme conditions; yet, organisms simultaneously adapted to low pH, high salt and high temperature are unknown. We combined environmental 16S/18S rRNA-gene metabarcoding, cultural approaches, fluorescence-activated cell sorting, scanning electron microscopy and chemical analyses to study samples along such unique polyextreme gradients in the Dallol-Danakil area (Ethiopia). We identify two physicochemical barriers to life in the presence of surface liquid water defined by high chaotropicity-low water activity in Mg<sup>2+</sup>/Ca<sup>2+</sup>-dominated brines and hyperacidity-salt combinations. When detected, life was dominated by highly diverse ultrasmall archaea widely distributed across phyla with and without previously known hyperhalophilic members. We detect active silica encrustment/fossilization of cells but also abiotic biomorphs of varied chemistry, raising warnings for the interpretation of morphological biosignatures on Earth and beyond.

## One Sentence Summary:

The absence of life from some polyextreme sites in the presence of liquid surface water on Earth helps to circumscribe habitability

# **Main Text:**

Microbial life has adapted to so-called extreme values of temperature, pH or salinity, but also to several polyextreme, e.g. hot acidic or salty alkaline, ecosystems (1, 2). However, organisms adapted simultaneously to low pH and high salt, and eventually also high temperature, are not known (1). Are molecular adaptations to those combinations incompatible or (hot) acidic hypersaline environments simply rare and unexplored? The Dallol geothermal dome and its surroundings (Danakil Depression, Afar, Ethiopia) allow to address this question by offering unique polyextreme gradients combining high salt content (20 to >50%; either  $Mg^{2+}/Ca^{2+}$  or  $Na^{+}/Fe^{2+/3+}$ -rich), high temperature (25-110°C) and low pH ( $\leq -1.5$  to 6). Dallol is an up-lifted (~40 m) dome structure located in the North of the Danakil depression (~120 m below-sea-level), a 200 km-long basin within the Afar rift, at the triple junction between the Nubian, Somalian and Arabian Plates (3). Lying only 30 km north of the hypersaline, hydrothermally-influenced, Lake Assale (Karum) and the Erta Ale volcanic range, Dallol does not display volcanic outcrops but intense degassing and hydrothermal activity. These activities are observed on the salt dome and the adjacent Black Mountain and Yellow Lake (Gaet'Ale) areas (3, 4) (Fig. 1a-b). Gas and fluid isotopic measurements indicate that meteoritic waters, notably infiltrating from the high Ethiopian plateau (>2,500 m), interact with an underlying geothermal reservoir (280-370°C) (4, 5). Further interaction of those fluids with the km-thick marine evaporites filling the Danakil depression results in unique combinations of polyextreme conditions and salt chemistries (3, 4, 6, 7), which have led some authors consider Dallol as a Mars analog (8).

Here, we use environmental 16S/18S rRNA-gene metabarcoding, cultural approaches, fluorescence-activated cell sorting and scanning electron microscopy combined with chemical analyses to explore microbial occurrence, diversity and potential fossilization along Dallol-Danakil polyextreme gradients. Our results strongly suggest the absence of active life in the most polyextreme conditions, despite occasional detection of imported dispersal forms. Regardless of temperature, we identify two physicochemical barriers to life in the presence of surface liquid water defined by: i) high chaotropicity-low water activity in  $Mg^{2+}/Ca^{2+}$ -dominated brines (relatively moderately acidic Black and Yellow lakes), supporting previous suggestions (9, 10) and ii) hyperacidity-salt combinations (pH<0-3/NaCl-saturation), suggesting incompatible molecular adaptations beyond those limits. However, when detected (Dallol canyon cave, dome base, Lake Assale/Karum), microbial life is extremely diverse and dominated (>85-95%) by ultrasmall archaea belonging to Halobacteria and Nanohaloarchaeota but also to many other phyla without previously known hyperhalophilic members. We hypothesize that high cytoplasmic  $K^{+}$  levels, an original archaeal adaptation to hyperthermophily, might have been exapted for hyperhalophily. Finally, we detect active silica encrustment/fossilization of cells but also abiotic biomorphs of varied chemistry in samples where there is no life. Our work has

implications to circumscribe planetary habitability (11, 12), raising warnings for the interpretation of morphological biosignatures on Earth and beyond.

## Results

To investigate the distribution and, eventually, type of microbial life along those polyextreme gradients, we analyzed a large variety of water and mineral samples collected mainly in two field expeditions (January 2016 and 2017) in four major zones (Fig. 1, Fig. S1-S2, Table S1). The first zone corresponded to the hypersaline (~30-35%) hyperacidic (pH between ~0 and -1; values down to -1.6 were measured on highly concentrated and oxidized brines on site) and sometimes hot (20-108°C) colorful ponds on the top of the Dallol dome (Fig. 1c, Figs. S1a and S2a-i, Table S1). The second zone comprised the salt canyons located at the Southwestern extremity of the Dallol dome and the Black Mountain area that includes the Black Lake (Figs. 1b and 1d; Figs. S1b-c and S2l-q). Water samples collected in a cave reservoir (Gt samples) and in geothermally-influenced ephemeral pools at the dome base (PS/PS3) were hypersaline (~30%), with moderate temperature (~30°C) and acidity (pH ~4-6). By contrast, pools located near the small (~15 m diameter), extremely hypersaline (>70%), hot (~70°C) and acidic (pH~3) Black Lake were slightly more acidic (pH~3), warmer (40°C) and hypersaline (35-60%) than dome-base pools (PSBL; Table S1). The third zone corresponded to the Yellow Lake and neighboring ponds, an acidic (pH~1.8), warm (~40°C) and extremely saline (13) system (≥50%) actively emitting toxic gases, including light hydrocarbons<sup>9</sup>, as attested by numerous dead birds around (Fig. 1e, Figs. S1d and S2j-k). The fourth zone comprised the hypersaline (~30%), almost neutral (pH~6.5), Lake Assale (Fig. 1b, Fig. S2r), which we used as a milder, yet extreme, Danakil system for comparison. In contrast with a continuous degassing activity, the hydrothermal manifestations were highly dynamic, especially on the dome and the Black Mountain area. Indeed, the area affected by hydrothermal activity in January 2017 was much more extensive than the year before (Fig. 1 and Fig. S1). Dallol chimneys and hyperacidic ponds can appear and desiccate in a matter of days or weeks, generating a variety of evaporitic crystalline structures observable in situ (14). Likewise, very active, occasionally explosive (salt ‘bombs’), hydrothermal activity characterized by hot (110°C), slightly acidic (pH~4.4), black hypersaline fluids was detected in the Black Mountain area in 2016 (‘Little Dallol’; sample BL6-01; Figs. S1b and S2l) but not in the following years. Likewise, active bischofite flows (3, 4, 15) were observed in the Black Mountain area in 2016 but not in 2017.

To assess potential correlations between microbial life and local chemistry, we analyzed the chemical composition of representative samples used in parallel for microbial diversity analyses (see Supplementary Methods). Our results revealed three major types of solution chemistry depending on the dominant elements (Fig. 2a; Fig. S3a): 1) In agreement with recent observations, Dallol ponds were characterized by NaCl supersaturated brines highly enriched in Fe with different oxidation states, largely explaining color variation (14). Potassium and sulfur were also abundant (Table S2). 2) By contrast, samples from the salt canyons and plain near Dallol and Lake Assale were essentially NaCl-dominated, with much lower Fe content, while the Yellow and Black lakes and associated ponds had very high Mg<sup>2+</sup> and Ca<sup>2+</sup> concentrations (Table S2). Many aromatic compounds were identified, especially in Dallol and Yellow Lake fluids (Supplementary Data S1). Because high chaotropicity associated with Mg<sub>2</sub>Cl-rich brines, high ionic strength and low water activity (*a<sub>w</sub>*) are thought to be limiting factors for life (9, 10, 16), we determined these parameters in representative samples (Table S3). Only Black and

Yellow lake samples displayed life-limiting chaotricity and  $a_w$  values according to established limits (9, 10, 16). A principal component analysis (PCA) showed that the sampled environments were distributed in three major groups depending on water chemistry, pH and temperature: Black and Yellow Lake samples, anticorrelating with  $a_w$ , Dallol dome samples, mostly correlating with  $a_w$  but anticorrelating with pH, and Dallol canyon water reservoir (Gt samples) and Lake Assale, correlating both with  $a_w$  and pH (Fig. 2b).

To ascertain the occurrence and diversity of microbial life along these physicochemical gradients, we purified DNA from a broad selection of water samples (0.2-30- $\mu$ m cell fraction), and solid samples (gypsum and halite-rich salt crusts, compacted sediment and soil-like samples; Table S1). We carried out 16S/18S rRNA gene-based diversity studies by high-throughput short-amplicon sequencing but also sequenced almost-full-length genes from clone libraries, providing local reference sequences for more accurate phylogenetic analyses (see Supplementary Methods). Despite intensive PCR efforts and extensive sampling in Dallol polyextreme ponds, including pools that were active in two consecutive years (Fig. S1) to minimize ephemeral system-derived effects, we only amplified 16S/18S rRNA genes from Dallol canyon cave water, the dome-base geothermally-influenced salt plain and Lake Assale, but never from the Dallol dome and Black/Yellow lakes (Fig. 3a). To check whether this resulted from excessively low DNA amounts in those samples (although relatively large volumes were filtered), we carried out semi-nested PCR reactions using as templates potential amplicons produced during the first PCR-amplification reaction, including first-PCR negative controls. Almost all samples produced amplicons in semi-nested PCR-reactions, including the first-PCR blanks (Fig. 3a).

Metabarcoding analysis revealed that amplicons from direct PCR-reactions (PS/PS3, Gt, Assale) were largely dominated by archaeal sequences (>85%), grouping in diverse and abundant OTUs (Table S4). By contrast, amplicons derived from Dallol ponds, Black and Yellow lakes but also first-PCR 'negative'-controls were dominated by bacterial sequences. Most of them were related to well-known kit and laboratory contaminants (17, 18), other were human-related bacteria likely introduced during intensive afar and tourist daily visits to the site; a few archaeal sequences might result from aerosol cross-contamination despite extensive laboratory precautions (see Supplementary Methods). After removal of contaminant sequences (grey bars, Fig. 3a; Supplementary Data S2), only rare OTUs encompassing few reads (mostly archaeal) could be associated to Dallol dome or Yellow Lake waters, which we interpret as likely dispersal forms (dusty wind is frequent in the area). Slightly higher abundances of archaeal OTUs were identified in 'soil' samples, i.e. samples retrieved from salty consolidated mud or crusts where dust brought by the wind from the surrounding plateaus accumulates and starts constituting a proto-soil (with incipient microbial communities). Therefore, while we cannot exclude the presence of active life in these 'soil' samples, our results strongly suggest that active microbial life is absent from polyextreme Dallol ponds and the Black and Yellow lakes.

By contrast, PS/PS3, Gt and Assale samples harbored extremely diverse archaea (2,653 OTUs conservatively determined at 95% identity, i.e. genus level) that virtually spanned the known archaeal diversity (Fig. 3; Table S4; Supplementary Data S2). Around half of that diversity belonged to Halobacteria, and an additional quarter to the Nanohaloarchaeota (19). The rest of archaea distributed in lineages typically present in hypersaline environments, e.g. the Methanonatronoarchaeia (20, 21) or Candidate Division MSBL1, thought to encompass methanogens (22) and/or sugar-fermentors (23), but also other archaeal groups not specifically associated with salty systems. These included Thermoplasmata and Archaeoglobi within Euryarchaeota, Woesearchaeota and other lineages (Aenigmarchaeota, Altiarchaeales) usually



grouped as DPANN (24-26) and Thaumarchaeota and Crenarchaeota (Sulfolobales) within the TACK/Proteoarchaeota (27) (Fig. 3a; Supplementary Data S2). In addition, based on the fact that rRNA GC content correlates with growth temperature, around 27% and 6% of archaeal OTUs were inferred to correspond to, respectively, thermophilic and hyperthermophilic organisms (see Supplementary Methods; Fig. 3b). As previously observed (19, 24, 25), common archaeal primers for near-full 16S rRNA genes (Fig. 3c, red dots) failed to amplify Nanohaloarchaeota and other divergent DPANN lineages. These likely encompass ectosymbionts/parasites (24-26, 28). Given their relative abundance and co-occurrence in these and other ecosystems, it is tempting to hypothesize that Nanohaloarchaeota are (ecto)symbionts of Halobacteria; likewise, Woesearchaeota might potentially be associated with *Thermoplasma*-like archaea. Although much less abundant, bacteria belonging to diverse phyla, including CPR, were also present in these samples (710 OTUs; Fig. S4; Table S4; Supplementary Data S2). In addition to typical hyperhalophilic genera (e.g. *Salinibacter*, Bacteroidetes), one Deltaproteobacteria group and two divergent bacterial clades were overrepresented in Dallol canyon Gt samples. Less abundant and diverse, eukaryotes were present in Lake Assale and, occasionally, the salt plain and Gt, being dominated by halophilic *Dunaliella* algae (Fig. S5; Supplementary Data S3).

Consistent with metabarcoding results, and despite the use of various culture media and growth conditions mimicking local environments (see Supplementary Methods), cultural approaches did not yield enrichments for any of the Dallol dome, Black and Yellow lake samples. We obtained enrichments from the canyon cave (Gt/7Gt) and salt plain (PS/PS3) samples in most culture media (except on benzoate/hexadecane) and tested conditions (except at 70°C in the dark). A single isolate (PS3-A1) was obtained from serial dilutions. It grew only at 37°C and optimal pH 5.5 (range 3-7). Its 16S rRNA gene was 98.5% identical to that of *Halarchaeum rubridurum* MH1-16-3 (NR\_112764), an acidophilic haloarchaeon growing at pH 4.0-6.5 (29). Likewise, multiparametric fluorescence analysis showed no DNA fluorescence above background for Dallol and Yellow Lake samples (Fig. S6). Because optical and scanning electron microscopy (SEM) observations suggested that indigenous cells were unusually small, we applied fluorescence-activated cell-sorting (FACS) to samples from the different Dallol environments, including samples with almost no events above noise (Table S1) followed by systematic SEM analysis of sorted events. We only detected cells in Dallol cave water and salt plain samples but not in dome ponds or Yellow Lake samples (Fig. S6). Sorted cells were usually small to ultrasmall (down to 0.25-0.3 µm diameter; Fig. 4). In PS samples, some of these small cells formed colonies (Fig. S6, Fig. 4c) sometimes surrounded by an exopolymeric matrix cover (Fig. 4h). The presence of cytoplasmic bridges and/or potential cell fusions (Fig. S6, Fig. 4c) suggest that they might be archaeal colonies (30). FACS-sorted fluorescent particles in Dallol pond samples appeared to correspond exclusively to salt crystals or cell-sized amorphous minerals morphologically resembling cells, i.e. biomorphs (31, 32) (e.g. Fig. 4d in comparison with Fig. 4c). This prompted us to carry out a more systematic search for abiotic biomorphs in our samples. SEM observations coupled with chemical mapping by energy dispersive X-ray spectrometry (EDXS) showed a variety of cocci-like biomorph structures of diverse elemental compositions. Many of them were Si biomorphs (Dallol ponds, Yellow and Assale lakes), but we also detected Fe-Al silicates (Gt), S or S-rich biomorphs (Dallol ponds), and Ca or Mg chlorides (Yellow lake, BLPS samples). (Fig. 4; Table S5; Supplementary Data S6-S7). At the same time, we observed Si-encrusted rod-shaped cells in Lake Assale samples (Fig. 4i). Therefore, silica

rounded precipitates represent ultrasmall-cell-like biomorphs in samples with no detectable life but contribute to cell encrustment and potential fossilization when life is present.

## Discussion

Our work has three major implications. First, by studying the microbial distribution along gradients of polyextreme conditions in the geothermal area of Dallol and its surroundings in the Danakil Depression, we identify two major physicochemical barriers that prevent life to thrive in the presence of liquid water on the surface of our planet and, potentially, elsewhere (11), despite it is a widely accepted criterion for habitability. Confirming previous studies (9, 10, 16), one such barrier is imposed by high chaotropicity and low  $a_w$ , which are associated to high  $Mg^{2+}$ -brines in Black and Yellow lake areas. The second barrier is imposed by hyperacid-hypersaline combinations ( $pH < 3$ ; salt  $> 30\%$ ), regardless of temperature. This suggests that molecular adaptations to simultaneous low-pH and high-salt extremes are incompatible beyond those limits. In principle, more acidic proteins, intracellular  $K^+$  accumulation (salt-in strategy) or internal positive membrane potential generated by cations or  $H^+$ /cation antiporters serve both acidophilic and halophilic adaptations (33-35). However, membrane stability/function problems and/or high external  $Cl^-$  concentrations inducing  $H^+$  and cation ( $K^+/Na^+$ ) import and potentially disrupting membrane bioenergetics (34), might be deleterious under these conditions. Future studies should help to determine the molecular determinants of such an incompatibility. Second, although extreme environments usually are low-diversity systems, we identify here exceptionally diverse and abundant archaea spanning known major taxa in hypersaline, mildly acidic systems near life-limit conditions. A wide archaeal (and to a lesser extent, bacterial) diversity seems consistent with suggestions that NaCl-dominated brines are not as extreme as previously thought (36) but also with recent observations that the mixing of meteoric and geothermal fluids leads to hyperdiverse communities (37). Nonetheless, life at high salt requires extensive molecular adaptations (9, 10, 16, 36), which might seem at odds with multiple independent adaptations to hyperhalophily across archaea. Among those adaptations, the intracellular accumulation of  $K^+$  (salt-in strategy) has been crucial. Based on the observation that the deepest archaeal branches correspond to (hyper)thermophilic lineages (38) and that non-halophilic hyperthermophilic archaea can have high intracellular  $K^+$  (1.1-3M) for protein thermoprotection (39, 40) (thermoacidophiles also need  $K^+$  for pH homeostasis (34)), we hypothesize that intracellular  $K^+$  accumulation is an ancestral archaeal trait that has been independently exapted in different taxa for adaptation to hypersaline habitats. Finally, the extensive occurrence of abiotic, mostly Si-rich, biomorphs mimicking the simple shape and size of ultrasmall cells in the hydrothermally-influenced Dallol settings reinforces the equivocal nature of morphological microfossils (31) and calls for the combination of multiple biosignatures before claiming the presence of life on the early Earth and beyond.

## Materials and Methods

### Sampling and measurement of physicochemical parameters on site

Samples were collected during two field trips carried out in January 2016 and January 2017 (when air temperature rarely exceeded 40-45°C); a few additional samples were collected in

January 2018 (Fig. 1; Fig. S1 and Table S1). All sampling points and mapping data were georeferenced using a Trimble® handheld GPS (Juno SB series) equipped with ESRI software ArcPad® 10. Cartography of hydrogeothermal activity areas was generated using ESRI GIS ArcMap™ mapping software ArcGis® 10.1 over georeferenced Phantom-4 drone images taken by O. Grunewald during field campaigns, compared with and updating previous local geological cartography (4). Samples were collected in three major areas at the Dallol dome and its vicinity (Fig. 1b): i) the top of the Dallol dome, comprising various hydrothermal pools with diverse degrees of oxidation (Fig. 1c); ii) the Black Mountain area (Fig. 1d), including the Black Lake and surrounding bischofite flows and the South-Western salt canyons harboring water reservoirs often influenced by the geothermal activity and iii) the Yellow Lake (Gaet' Ale) area (Fig. 1e). We also collected water samples from the hypersaline Lake Assale (Karum), located a few kilometers to the South in the Danakil Depression (Fig. 1b). Physicochemical parameters (Table S1) were measured in situ with a YSI Professional Series Plus multiparameter probe (pH, temperature, dissolved oxygen, redox potential) up to 70°C and a Hanna HI93530 temperature probe (working range -200/1,000°C) and a Hanna HI991001 pH probe (working pH range -2.00/16.00) at higher temperatures. Salinity was measured with a refractometer on 1:10 dilutions in MilliQ water. Water samples for chemical analyses were collected in 50 ml glass bottles after prefiltration through 0.22 µm pore-diameter filters; bottles were filled to the top and sealed with rubber stoppers to prevent the (further) oxidation of reduced fluids. Solid and water samples for microbial diversity analyses and culturing assays were collected under the most possible aseptic conditions to prevent contamination (gloves, sterile forceps and containers). Samples for culture assays were kept at room temperature. Salts and mineral fragments for DNA-based analyses were conditioned in Falcon tubes and fixed with absolute ethanol. Water samples (volumes for each sample are indicated in Table S1) were filtered through 30 µm pore-diameter filters to remove large particles and sequentially filtered either through 0.22 µm pore-diameter filters (Whatman®) or using 0.2 µm pore-size Cell-Trap units (MEM-TEQ Ventures Ltd, Wigan, UK). Filters or Cell-Trap concentrates retaining 0.2-30 µm particles were fixed in 2-ml cryotubes with absolute ethanol (>80% final concentration). Back in the laboratory, ethanol-fixed samples were stored at -20°C until use.

#### Chemical analyses, chaotropicity, ionic strength and water activity

The chemical composition of solid and 0.2 µm-prefiltered liquid samples was analyzed at the SIDI service (Universidad Autónoma de Madrid). Major and trace elements in liquid samples were analyzed by total reflection X-ray fluorescence (TXRF) with a TXRF-8030c FEI spectrometer and inductively coupled plasma mass spectrometry (ICP-MS) using a Perkin-Elmer NexION 300XX instrument. Ions were analyzed using a Dionex DX-600 ion chromatography system. Organic molecules were characterized using a Varian HPLC-DAD/FL/LS liquid chromatograph. Crystalline phases in solid samples were characterized by x-ray diffraction using a X'Pert PRO Theta/Theta diffractometer (Panalytical) and identified by comparison with the International Centre for Diffraction Data (ICDD) PDF-4+ database using the 'High Score Plus' software (Malvern Panalytical <https://www.malvernpanalytical.com/es/products/category/software/x-ray-diffraction-software/highscore-with-plus-option>). Inorganic data are provided in Table S2; organic and ionic chemistry data in Supplementary Data S1. Chaotropicity and ionic strength values (Table S3) were calculated according to Cray and coworkers (41) based on the abundance of dominant Na, K, Mg, Ca and Fe cations and, on the ground that Cl is the dominant anion, assuming they

essentially form chlorine salts (NaCl, KCl, MgCl<sub>2</sub>, CaCl<sub>2</sub> and FeCl<sub>2</sub>). Water activity was measured on 10-ml unfiltered aliquots at room temperature using a HC2-AW probe and HP23-AW-A indicator (Rotronic AG, Bassersdorf, Switzerland) calibrated at 23°C using the AwQuick acquisition mode. Principal component analyses (PCA) of samples, chemical and physicochemical parameters (Fig.2 and Fig.S3) were done using R-software (42) packages FactoMineR (43) and factoextra (44).

# DNA purification and 16/18S rRNA gene metabarcoding

DNA from filters, Cell-Trap concentrates and grinded solid samples was purified using the Power Soil DNA Isolation Kit (MoBio, Carlsbad, CA, USA) under a UV-irradiated Erlab CaptairBio DNA/RNA PCR Workstation. Prior to DNA purification, filters were cut in small pieces with a sterile scalpel and ethanol remaining in cryotubes filtered through 0.2 µm pore-diameter filters and processed in the same way. Ethanol-fixed Cell-Trap concentrates were centrifuged for 10 min at 13,000 rpm and the pellet resuspended in the first kit buffer. Samples were let rehydrate for at least 2h at 4°C in the kit resuspension buffer. For a selection of Cell-Trap concentrates, FACS-sorted cells and to monitor potential culture enrichments, we also used the Arcturus PicoPure DNA Isolation kit (Applied Biosystems – Foster City, CA, USA; samples labeled pp). DNA was resuspended in 10 mM Tris-HCl, pH 8.0 and stored at -20°C. Bacterial and archaeal 16S rRNA gene fragments of approximately 290 bp encompassing the V4 hypervariable region were PCR-amplified using U515F (5'-GTGCCAGCMGCCGCGGTAA) and U806R (5'-GGACTACVSGGGTATCTAAT) primers. PCR reactions were conducted in 25 µl, using 1.5 mM MgCl<sub>2</sub>, 0.2 mM of each dNTP (PCR Nucleotide Mix, Promega), 0.1 µM of each primer, 1 to 5 µl of purified 'DNA' and 1 U of the hot-start Taq Platinum polymerase (Invitrogen, Carlsbad, CA, USA). GoTaq (Promega) was also tried when amplicons were not detected but did not yield better results. Amplification reactions proceeded for 35 cycles (94°C for 15 s, 50 to 55°C for 30 s and 72°C for 90 s), after a 2 min-denaturation step at 94°C and before a final extension at 72°C for 10 min. Amplicons were visualized after gel electrophoresis and ultrasensitive GelRed® nucleic acid gel stain (Biotium, Fremont, CA, USA) on a UV-light transilluminator. When direct PCR reactions failed to yield amplicons after several assays, PCR conditions and using increasing amounts of input potential DNA, semi-nested reactions using those primers were carried out using as template 1 µl of PCR products, including negative controls, from a first amplification reaction done with universal prokaryotic primers U340F (5'-CCTACGGGRBGCASCAG) and U806R. Eukaryotic 18S rRNA gene fragments including the V4 hypervariable region were amplified using primers EK-565F (5'-GCAGTTAAAAAGCTCGTAGT) and 18S-EUK-1134-R-UNonMet (5'-TTTAAGTTTCAGCCTTGCG). Primers were tagged with different Molecular IDentifiers (MIDs) to allow multiplexing and subsequent sequence sorting. Amplicons from at least 5 independent PCR products for each sample were pooled together and then purified using the QIAquick PCR purification kit (Qiagen, Hilden, Germany). Whenever semi-nested PCR reactions yielded amplicons, semi-nested reactions using as input first-PCR negative controls also yielded amplicons (second-PCR controls did not yield amplicons). Products of these positive 'negative' controls were pooled in two control sets (1 and 2) and sequenced along with the rest of amplicons. DNA concentrations were measured using Qubit™ dsDNA HS assays (Invitrogen). Equivalent amplicon amounts obtained for 54 samples (including controls) were multiplexed and sequenced using paired-end (2x300 bp) MiSeq Illumina technology (Eurofins Genomics, Ebersberg, Germany). In parallel, we tried to amplify near-complete 16S/18S rRNA



*Belilla et al.*

gene fragments (~1400-1500 bp) using combinations of forward archaea-specific primers (21F, 5'-TTCCGGTTGATCCTGCCGGA; Ar109F, 5'-ACKGCTGCTCAGTAACACGT) and bacteria-specific primers (27F, 5'-AGAGTTTATCCTGGCTCAG) with the prokaryotic reverse primer 1492R (5'-GGTTACCTTGTTACGACTT) and eukaryotic primers 82F (5'-GAACTGCGAATGGCTC) and 1520R (5'-CYGCAGGTTTCACCTAC). When amplified, DNA fragments were cloned using TopoTA<sup>TM</sup> cloning (Invitrogen) and clone inserts were Sanger sequenced to yield longer reference sequences. Forward and reverse Sanger sequences were quality-controlled and merged using Codon Code Aligner (<http://www.codoncode.com/aligner/>). Sanger sequences have been deposited in GenBank (NCBI) with accession numbers MK894601-MK894820 and Illumina sequences in GenBank Short Read Archive with BioProject number PRJNA541281.

### Sequence treatment and phylogenetic analyses

Paired-end reads were merged and treated using a combination of existing software to check quality, eliminate primers and MIDNs and eliminate potential chimeras. Sequence statistics are given in Table S4. Briefly, read merging was done with FLASH (45), primers and MIDNs trimmed with cutadapt (46) and clean merged reads dereplicated using vsearch (47), with the uchime\_denovo option to eliminate potential chimeras. The resulting dereplicated clean merged reads were used then to define operational taxonomic units (OTUs) at 95% identity cut-off using CD-HIT-EST (48). This cut-off offered i) a reasonable operational approximation to the genus level diversity while producing a manageable number of OTUs to be included in phylogenetic trees (see below) and ii) allowed us a conservative identification of potential contaminants in our semi-nested PCR-derived datasets. Diversity (Simpson), richness (Chao1) and evenness indices were determined using R-package "vegan" (Table S4). OTUs were assigned to known taxonomic groups based on similarity with sequences of a local database including sequences from cultured organisms and environmental surveys retrieved from SILVAv128 (49) and PR2v4 (50). The taxonomic assignment of bacteria and archaea was refined by phylogenetic placement of OTU representative sequences in reference phylogenetic trees. To build these trees, we produced, using Mafft-linsi v7.38 (51), alignments of near full-length archaeal and bacterial 16S rRNA gene sequences comprising Sanger sequences from our gene libraries (144 archaeal, 91 bacterial) and selected references for major identified taxa plus the closest blast-hits to our OTUs (702 archaea, 2,922 bacterial). Poorly aligned regions were removed using TrimAl (52). Maximum likelihood phylogenetic trees were constructed with IQ-TREE (53) using the GTR model of sequence evolution with a gamma law and taking into account invariable sites (GTR+G+I). Node support was estimated by ultrafast bootstrapping as implemented in IQ-TREE. Shorter OTU representative sequences (2,653 archaeal, 710 bacterial) were then added to the reference alignment using MAFFT (accurate -linsi 'addfragments' option). This final alignment was split in two files (references and OTUs) before using the EPA-ng tool (<https://github.com/Pbdas/epa-ng>) to place OTUs in reference trees reconstructed with IQ-TREE. The jplace files generated by EPA-ng were transformed into newick tree files with the genesis library (<https://github.com/lczech/genesis>). Tree visualization and ring addition were done with GraphLan (54). To see whether our OTUs might correspond to thermophilic species, we first plotted the GC content of the 16S rRNA gene region used for metabarcoding analyses of a selection of 88 described archaeal species with optimal growth temperatures ranging from 15 to 103°C. A regression analysis confirmed the occurrence of a positive correlation (55) between rRNA GC content and optimal growth temperature also for this shorter 16S rRNA gene

amplified region (Fig.3b). We then plotted the GC content of the archaeal OTUs on the same graph.

## Cultures

Parallel culture attempts were carried out in two different laboratories. We used several culture media derived from a classical halophile's base mineral growth medium (56) containing ( $\text{g l}^{-1}$ ): NaCl (234), KCl (6),  $\text{NH}_4\text{Cl}$  (0.5),  $\text{K}_2\text{HPO}_4$  (0.5),  $(\text{NH}_4)_2\text{SO}_4$  (1),  $\text{MgSO}_4 \cdot 7\text{H}_2\text{O}$  (30.5),  $\text{MnCl}_2 \cdot 7\text{H}_2\text{O}$  (19.5),  $\text{CaCl}_2 \cdot 6\text{H}_2\text{O}$  (1.1) and  $\text{Na}_2\text{CO}_3$  (0.2). pH was adjusted to 4 and 2 with 10N  $\text{H}_2\text{SO}_4$ . The autoclaved medium was amended with filter-sterilized cyanocobalamin ( $1 \mu\text{M}$  final concentration) and 5 ml of an autoclaved  $\text{CaCl}_2 \cdot 6\text{H}_2\text{O}$  1M stock solution. Medium MDH2 contained yeast extract ( $1 \text{ g l}^{-1}$ ) and glucose ( $0.5 \text{ g l}^{-1}$ ). Medium MDSH1 had only 2/3 of each base medium salt concentration plus  $\text{FeCl}_3$  ( $0.1 \text{ g l}^{-1}$ ) and 10 ml.l<sup>-1</sup> of Allen's trace solution. It was supplemented with three energy sources (prepared in 10 ml distilled water at pH2 and sterilized by filtration): yeast extract (1) and glucose ( $0.5 \text{ g l}^{-1}$ ) (MDS1-org medium);  $\text{Na}_2\text{S}_2\text{O}_3$  ( $5 \text{ g l}^{-1}$ ) (MDS1-thio medium) and  $\text{FeSO}_4 \cdot 7\text{H}_2\text{O}$  ( $30 \text{ g l}^{-1}$ ) (MDS1-Fe medium). Medium MDSH2 mimicked more closely some Dallol salts as it also contained ( $\text{g l}^{-1}$ ):  $\text{FeCl}_3$  (0.1),  $\text{MnCl}_2 \cdot 4\text{H}_2\text{O}$  (0.7),  $\text{CuSO}_4$  (0.02),  $\text{ZnSO}_4 \cdot 7\text{H}_2\text{O}$  (0.05) and LiCl (0.2) as well as 10 ml l<sup>-1</sup> of Allen's trace solution combined with the same energy sources used for MDSH1, yielding media MDSH2-org, MDSH2-thio and MDSH2-Fe. For enrichment cultures, we added 0.1 ml liquid samples to 5 ml medium at pH 2 and 4 and incubated at 37, 50 and 70°C in 10-ml sterile glass tubes depending on the original sample temperatures. Three additional variants of the base salt medium supplemented with  $\text{FeCl}_3$  and trace minerals contained  $0.2 \text{ g l}^{-1}$  yeast extract (SALT-YE),  $0.5 \text{ g l}^{-1}$  thiosulfate (SALT-THIO) or  $0.6 \text{ g l}^{-1}$  benzoate and 5 mM hexadecane (SALT-BH). The pH of these media was adjusted with 34% HCl to 1.5 for Dallol and Black Lake samples, and to 3.5 for YL, PS3 and PSBL samples. 1-ml of sample was added to 4 ml of medium and incubated at 45°C in a light regime and at 37 and 70°C in the dark. We also tried cultures in anaerobic conditions. Potential growth was monitored by optical microscopy and, for some samples, SEM. In the rare cases where enrichments were obtained, we attempted isolation by serial dilutions.

## Flow cytometry and fluorescence-activated cell sorting (FACS)

The presence of cell/particle populations above background level in Dallol samples was assessed with a flow-cytometer cell-sorter FACS Aria<sup>TM</sup> III (Becton Dickinson). Several DNA dyes were tested for lowest background signal in forward scatter (FSC) red ( $695 \pm 20 \text{ nm}$ ) and green ( $530 \pm 15 \text{ nm}$ ) fluorescence (Fig. S6a) using sterile SALT-YE medium as blank. DRAQ5<sup>TM</sup> and SYTO13® (ThermoFisher) were retained and used at  $5 \mu\text{M}$  final concentration to stain samples in the dark at room temperature for 1 h. Cell-Trap concentrated samples were diluted at 20% with 0.1- $\mu\text{m}$  filtered and autoclaved MilliQ® water. The FACS Aria<sup>TM</sup> III was set at purity sort mode triggering on the forward scatter (FSC). Fluorescent target cells/particles were gated based on the FSC and red or green fluorescence (Fig. S6b) and flow-sorted at a rate of 1-1,000 particles per second. Sorting was conducted using the FACSDiva<sup>TM</sup> software (Becton Dickinson); figures were done with the FCSEXPRESS 6 software (De Novo Software). Sorted cells/particles were subsequently observed by scanning electron microscopy for characterization.

## Scanning electron microscopy (SEM) and elemental analysis

SEM analyses were carried out on natural samples, FACS-sorted cells/particles and a selection of culture attempts. Liquid samples were deposited on top of 0.1  $\mu\text{m}$  pore-diameter

filters (Whatman®) under a mild vacuum aspiration regime and briefly rinsed with 0.1-μm filtered and autoclaved MilliQ® water under the same vacuum regime. Filters were let dry and sputtered with carbon prior to SEM observations. SEM analyses were performed using a Zeiss ultra55 field emission gun (FEG) SEM. Secondary electron (SE2) images were acquired using an In Lens detector at an accelerating voltage of 2.0 kV and a working distance of ~7.5 mm. Backscattered electron images were acquired for chemical mapping using an angle selective backscattered (AsB) detector at an accelerating voltage of 15 kV and a working distance of ~7.5 mm. Elemental maps were generated from hyperspectral images (HyperMap) by energy dispersive X-ray spectrometry (EDXS) using an EDS QUANTAX detector. EDXS data were analyzed using the ESPRIT software package (Bruker).

# References:

1. J. P. Harrison, N. Gheeraert, D. Tsigelnitskiy, C. S. Cockell, The limits for life under multiple extremes. *Trends in microbiology* **21**, 204-212 (2013).
2. N. Merino *et al.*, Living at the extremes: Extremophiles and the limits of life in a planetary context. *Frontiers in microbiology* **10**, (2019).
3. J. Varet, in *Geology of Afar (East Africa). Regional Geology Reviews*, R. Oberhänsli, M. J. de Wit, F. M. Roure, Eds. (Springer, Cham, 2018), chap. 7, pp. 205-226.
4. H. Franzson, H. M. Helgadóttir, F. Óskarsson, in *Proceedings World Geothermal Congress*. (Melbourne, Australia, 2015), vol. 19-25 April, pp. 11.
5. T. H. Darrah *et al.*, Gas chemistry of the Dallol region of the Danakil Depression in the Afar region of the northern-most East African Rift. *Chemical Geology* **339**, 16-29 (2013).
6. J. G. Holwerda, R. W. Hutchinson, Potash-bearing evaporites in the Danakil area, Ethiopia. *Economic Geology* **63**, 124-150 (1968).
7. J. K. Warren, "Danakhil potash, Ethiopia: Beds of kainite/carnallite, Part 2 of 4," (2015).
8. B. Cavalazzi *et al.*, The Dallol geothermal area, Northern Afar (Ethiopia)-An exceptional planetary field analog on Earth. *Astrobiology*, (2019).
9. J. E. Hallsworth *et al.*, Limits of life in MgCl<sub>2</sub>-containing environments: chaotropy defines the window. *Environ Microbiol* **9**, 801-813 (2007).
10. A. Stevenson *et al.*, Is there a common water-activity limit for the three domains of life? *ISME J* **9**, 1333-1351 (2015).
11. C. P. McKay, Requirements and limits for life in the context of exoplanets. *Proceedings of the National Academy of Sciences of the United States of America* **111**, 12628-12633 (2014).
12. C. Moissl-Eichinger, C. Cockell, P. Rettberg, Venturing into new realms? Microorganisms in space. *FEMS microbiology reviews* **40**, 722-737 (2016).
13. E. Pérez, Y. Chebude, Chemical analysis of Gaet'ale, a hypersaline pond in Danakil Depression (Ethiopia): New record for the most saline water body on Earth. *Aquat Geochem* **23**, 109-117 (2017).
14. E. Kotopoulou *et al.*, A polyextreme hydrothermal system controlled by iron: The case of Dallol at the Afar Triangle. *ACS earth & space chemistry* **3**, 90-99 (2019).
15. J. K. Warren, "Danakhil Potash, Ethiopia: Is the present geology the key? Part 1 of 4," (2015).
16. N. J. Tosca, A. H. Knoll, S. M. McLennan, Water activity and the challenge for life on early Mars. *Science (New York, N.Y.)* **320**, 1204-1207 (2008).

17. C. S. Sheik *et al.*, Identification and removal of contaminant sequences from ribosomal gene databases: Lessons from the Census of Deep Life. *Frontiers in microbiology* **9**, (2018).
18. L. S. Weyrich *et al.*, Laboratory contamination over time during low-biomass sample analysis. *Molecular ecology resources*, (2019).
- 5 19. P. Narasingarao *et al.*, De novo metagenomic assembly reveals abundant novel major lineage of Archaea in hypersaline microbial communities. *ISME J* **6**, 81-93 (2012).
20. D. Y. Sorokin *et al.*, Discovery of extremely halophilic, methyl-reducing euryarchaea provides insights into the evolutionary origin of methanogenesis. *Nat Microbiol* **2**, 17081 (2017).
- 10 21. D. Y. Sorokin *et al.*, Methanonatronarchaeum thermophilum gen. nov., sp. nov. and 'Candidatus Methanohalarchaeum thermophilum', extremely halo(natrono)philic methyl-reducing methanogens from hypersaline lakes comprising a new euryarchaeal class Methanonatronarchaeia classis nov. *International journal of systematic and evolutionary microbiology* **68**, 2199-2208 (2018).
- 15 22. S. Borin *et al.*, Sulfur cycling and methanogenesis primarily drive microbial colonization of the highly sulfidic Urania deep hypersaline basin. *Proceedings of the National Academy of Sciences of the United States of America* **106**, 9151-9156 (2009).
23. R. Mwirichia *et al.*, Metabolic traits of an uncultured archaeal lineage--MSBL1--from brine pools of the Red Sea. *Scientific reports* **6**, 19181 (2016).
- 20 24. C. J. Castelle *et al.*, Biosynthetic capacity, metabolic variety and unusual biology in the CPR and DPANN radiations. *Nature reviews. Microbiology* **16**, 629-645 (2018).
25. C. J. Castelle, J. F. Banfield, Major new microbial groups expand diversity and alter our understanding of the Tree of Life. *Cell* **172**, 1181-1197 (2018).
- 25 26. N. Dombrowski, J. H. Lee, T. A. Williams, P. Offre, A. Spang, Genomic diversity, lifestyles and evolutionary origins of DPANN archaea. *FEMS Microbiol Lett* **366**, (2019).
27. C. Petitjean, P. Deschamps, P. Lopez-Garcia, D. Moreira, Rooting the domain archaea by phylogenomic analysis supports the foundation of the new kingdom proteoarchaeota. *Genome biology and evolution* **7**, 191-204 (2014).
- 30 28. O. V. Golyshina *et al.*, 'ARMAN' archaea depend on association with euryarchaeal host in culture and in situ. *Nature communications* **8**, 60 (2017).
29. H. Minegishi *et al.*, Acidophilic haloarchaeal strains are isolated from various solar salts. *Saline systems* **4**, 16 (2008).
30. A. Naor, U. Gophna, Cell fusion and hybrids in Archaea: prospects for genome shuffling and accelerated strain development for biotechnology. *Bioengineered* **4**, 126-129 (2013).
- 35 31. J. M. Garcia-Ruiz *et al.*, Self-assembled silica-carbonate structures and detection of ancient microfossils. *Science (New York, N.Y.)* **302**, 1194-1197 (2003).
32. J. M. Garcia-Ruiz, E. Melero-Garcia, S. T. Hyde, Morphogenesis of self-assembled nanocrystalline materials of barium carbonate and silica. *Science (New York, N.Y.)* **323**, 362-365 (2009).
- 40 33. J. L. Slonczewski, M. Fujisawa, M. Dopson, T. A. Krulwich, Cytoplasmic pH measurement and homeostasis in bacteria and archaea. *Advances in microbial physiology* **55**, 1-79, 317 (2009).
34. A. Buetti-Dinh, O. Dethlefsen, R. Friedman, M. Dopson, Transcriptomic analysis reveals how a lack of potassium ions increases *Sulfolobus acidocaldarius* sensitivity to pH changes. *Microbiology (Reading, England)* **162**, 1422-1434 (2016).
- 45



35. N. Gunde-Cimerman, A. Plemenitas, A. Oren, Strategies of adaptation of microorganisms of the three domains of life to high salt concentrations. *FEMS microbiology reviews* **42**, 353-375 (2018).
36. C. J. D. Lee *et al.*, NaCl-saturated brines are thermodynamically moderate, rather than extreme, microbial habitats. *FEMS microbiology reviews* **42**, 672-693 (2018).
37. D. R. Colman, M. R. Lindsay, E. S. Boyd, Mixing of meteoric and geothermal fluids supports hyperdiverse chemosynthetic hydrothermal communities. *Nature communications* **10**, 681 (2019).
38. P. López-García, Y. Zivanovic, P. Deschamps, D. Moreira, Bacterial gene import and mesophilic adaptation in archaea. *Nature reviews. Microbiology* **13**, 447-456 (2015).
39. R. Hensel, H. König, Thermoadaptation of methanogenic bacteria by intracellular ion concentration. *FEMS Microbiology Letters* **49**, 75-79 (1988).
40. S. Shima, R. K. Thauer, U. Ermler, Hyperthermophilic and salt-dependent formyltransferase from *Methanopyrus kandleri*. *Biochemical Society transactions* **32**, 269-272 (2004).
41. J. A. Cray *et al.*, Chaotropicity: a key factor in product tolerance of biofuel-producing microorganisms. *Current opinion in biotechnology* **33**, 228-259 (2015).
42. R Development Core Team. (R Foundation for Statistical Computing, Vienna, Austria, 2017).
43. S. Lê, J. Josse, F. Husson, FactoMineR: An R package for multivariate analysis. *Journal of Statistical Software* **25**, 1-18 (2008).
44. A. Kassambara, F. Mundt. (<https://CRAN.R-project.org/package=factoextra>, 2017).
45. T. Magoc, S. L. Salzberg, FLASH: fast length adjustment of short reads to improve genome assemblies. *Bioinformatics* **27**, 2957-2963 (2011).
46. M. Martin, Cutadapt removes adapter sequences from high-throughput sequencing reads. *EMBnet.Journal* **17**, 10-12 (2011).
47. T. Rognes, T. Flouri, B. Nichols, C. Quince, F. Mahe, VSEARCH: a versatile open source tool for metagenomics. *PeerJ* **4**, e2584 (2016).
48. L. Fu, B. Niu, Z. Zhu, S. Wu, W. Li, CD-HIT: accelerated for clustering the next-generation sequencing data. *Bioinformatics* **28**, 3150-3152 (2012).
49. C. Quast *et al.*, The SILVA ribosomal RNA gene database project: improved data processing and web-based tools. *Nucleic Acids Res* **41**, D590-596 (2013).
50. L. Guillou *et al.*, The Protist Ribosomal Reference database (PR2): a catalog of unicellular eukaryote Small Sub-Unit rRNA sequences with curated taxonomy. *Nucleic Acids Res* **41**, D597-D604 (2013).
51. K. Katoh, D. M. Standley, MAFFT multiple sequence alignment software version 7: improvements in performance and usability. *Molecular biology and evolution* **30**, 772-780 (2013).
52. S. Capella-Gutierrez, J. M. Silla-Martinez, T. Gabaldon, trimAl: a tool for automated alignment trimming in large-scale phylogenetic analyses. *Bioinformatics* **25**, 1972-1973 (2009).
53. L. T. Nguyen, H. A. Schmidt, A. von Haeseler, B. Q. Minh, IQ-TREE: a fast and effective stochastic algorithm for estimating maximum-likelihood phylogenies. *Molecular biology and evolution* **32**, 268-274 (2015).
54. F. Asnicar, G. Weingart, T. L. Tickle, C. Huttenhower, N. Segata, Compact graphical representation of phylogenetic data and metadata with GraPhlAn. *PeerJ* **3**, e1029 (2015).

Belilla et al.

55. H. C. Wang, X. Xia, D. Hickey, Thermal adaptation of the small subunit ribosomal RNA gene: a comparative study. *Journal of molecular evolution* **63**, 120-126 (2006).
56. F. Rodriguez-Valera, F. Ruiz-Berraquero, A. Ramos-Cormenzana, Behaviour of mixed populations of halophilic bacteria in continuous cultures. *Canadian journal of microbiology* **26**, 1259-1263 (1980).

**Acknowledgments:** We are grateful to Olivier Grunewald for co-organizing the Dallol expeditions, documenting field research and providing drone images and to the Fondation Iris for funding the first field trip. We thank Luigi Cantamessa for the in situ logistics and discussions about local history. We acknowledge Dr. Makonen Tafari (Mekelle University), Abdul Ahmed Aliyu and the Afar authorities for local assistance as well as the Ethiopian army and the Afar police for providing security. We thank Jacques Barthél  my, Elektra Kotopoulou and Juanma Garcia-Ruiz for help and discussions during field trips. We thank H  l  ne Timpano and the UNICELL platform for single-cell sorting, Ana Guti  rrez-Preciado for bioinformatic assistance, Adrienne Kish and Charly Faveau for allowing us to measure water activity of selected samples at the Mus  um National d'Histoire Naturelle, Eric Viollier for discussion on chemical analyses and Georis Billo for script help to treat SEM pictures; **Funding:** This research was funded by the CNRS recurrent annual funding, the CNRS program TELLUS INTERRVIE and the European Research Council under the European Union's Seventh Framework Program (ERC Grant Agreement 322669). We thank the European COST Action TD1308 'Origins' for funding a short stay of A.L.A. in Orsay. J.B. was financed by the French Ministry of National Education, Research and Technology; **Author contributions:** P.L.G. and D.M. designed and supervised the research. P.L.G. organized the scientific expeditions. J.B., P.L.G., D.M., L. J. and J.M.L.G. collected samples and took measurements in situ. J.B., P.L.G. and P.B. carried out molecular biology analyses. J.B. and A.L.A. performed culture and chemistry analyses. J.B., G.R. and D.M. analyzed metabarcoding data. K.B. performed SEM analyses. J.M.L.G. mapped geothermal activity and georeferenced all samples. L.J. and J.B. performed FACS-derived analyses. P.L.G. and J.B. wrote the manuscript. All authors read and commented on the manuscript; **Competing interests:** Authors declare no competing interests; and **Data and materials availability:** Sanger sequences have been deposited in GenBank (NCBI) with accession numbers MK894601-MK894820 and Illumina sequences in GenBank Short Read Archive with BioProject number PRJNA541281.

## Supplementary Materials:

Figures S1-S6  
Tables S1-S5  
Data S1 to S7

## Figure legends

**Fig. 1. Overview of sampling sites at the polyextreme geothermal field of Dallol and its surroundings in the Danakil Depression, Ethiopia.** **a**, Location of the Dallol dome area in the Danakil Depression following the alignment of the Erta Ale volcanic range (Gada Ale, Alu-Dalafilla), Northern Ethiopia; **b**, closer view of the sampling zones in the Dallol area and Lake Assale or Karum (satellite image from Copernicus Sentinel 1; 2017, January 19th); **c-e**, geological maps showing the sampling sites at **(c)** the Dallol dome summit, **(d)** West salt canyons and Black Mountain, including the Black Lake and **(e)** Yellow Lake (Gaet'Ale) zone. Square and circles indicate the nature of collected samples and their color, the collection date. The size of circles is proportional to the collected water volume for analyses. Specific sample names are indicated in the aerial view shown in Fig. S1.

**Fig. 2. Principal Component Analysis (PCA) of the physicochemical data from Dallol area samples.** **a**, PCA of 29 samples according to their chemical composition (see Table S2). Transition metals group Cr, Mo, Mn, Sc, Zn, V, U, Ce, La, Cu; semimetals, As, B, Sb, Si; basic metals, Tl, Al, Ga, Sh; and alkali metals, Rb, Cs. Some elements are highlighted out of these groups owing to their high relative abundance or to their distant placement. A PCA showing individual metal variables can be seen in Fig. S3a. **b**, PCA of 22 samples and key potentially life-limiting physicochemical parameters in the Dallol area (temperature, pH, salinity, water activity). Water activity and salinity-related parameters are provided in Table S3.

**Fig. 3. Distribution and diversity of prokaryotes in samples from the Dallol mound and surrounding areas based on 16S rRNA metabarcoding data.** **a**, histograms showing the presence/absence and abundance of amplicon reads of archaea (upper panel) and bacteria (lower panel) obtained with universal prokaryotic primers. Samples yielding amplicons directly (negative PCR controls were negative) are shown on the right (Direct). Samples for which amplicons were only obtained after nested PCR, all of which also yielded amplicons in 'negative' controls, are displayed on the left (Nested PCR). Sequences identified in the 'negative' controls, considered as contaminants, are shaded in light grey in the corresponding Dallol samples. The phylogenetic affiliation of dominant archaeal and bacterial groups is color-coded. For details, see Supplementary Data S2-S3. **b**, GC content of archaeal OTUs plotted on a graph showing the positive correlation of GC content (for the same 16S rRNA region) and growth temperature of described archaeal species. **c**, phylogenetic tree of archaeal 16S rRNA gene sequences showing the phylogenetic placement of archaeal OTUs identified in the different environmental samples (full tree provided as Supplementary Data S4). Sequences derived from metabarcoding studies are represented with blue branches (Illumina sequences); those derived from cloning and Sanger sequencing of environmental samples, cultures and FACS-sorted cells are labelled with a red dot. Reference sequences are in black. Concentric circles around the tree indicate the presence/absence of the corresponding OTUs in different groups of samples (groups shown in panel a).

**Fig. 4. Scanning electron microscopy (SEM) pictures and chemical maps of cells and abiotic biomorphs identified in samples from the Dallol region.** **a-h**, SEM pictures of cells (**a-c**, **e-h**) and abiotic biomorphs (**d**). **i-o**, SEM images and associated chemical maps of cells and biomorphs; color intensity provides semi-quantitative information of the mapped elements. **a**, FACS-sorted dividing cells from sample PS (hydrated salt pan between the Dallol dome base and

*Belilla et al.*

the Black Lake); **b**, FACS-sorted ultrasmall cells from 7Gt samples (cave water reservoir, Dallol canyons); **c**, FACS-sorted colony of ultrasmall cells from sample PS (note cytoplasmic bridges between cells); **d**, FACS-sorted abiotic silica biomorphs from the Dallol pond 7DA9 (note the similar shape and morphology as compared to cells in panel c); **e**, cocci and halite crystals in 8Gt samples (cave water); **f**, long rod in 8Gt; **g**, FACS-sorted cells from Gt samples; **h**, FACS-sorted colonies from sample PS (note the bridge between one naked colony and one colony covered by an exopolymeric-like matrix); **i**, small cocci and amorphous Al-Mg-Fe-rich silicate minerals from Gt; **j**, NaCl crystals and S-Si-rich abiotic biomorphs from Dallol pond sample 7DA7; **k**, NaCl crystal and Si-biomorphs and **l**, Si-encrusted cell and Si-biomorphs in sample 8Ass (Lake Assale); **m**, Mg-Cl biomorph in sample BLPS\_04 (Black Lake area pond); **n**, S-rich biomorphs in Dallol pond 7DA9; **o**, Ca-Mg-Cl biomorph in YL-w2 (Yellow Lake pond). SEM photographs were taken using In Lens or AsB detectors; AsB was used for chemical mapping purposes. For additional images and SEM details, see Supplementary Data S6-S7. White arrows indicate cells difficult to recognize due to their small size and/or flattened aspect possibly resulting from sample preparation and/or high vacuum conditions within the SEM. The scale bar corresponds to 1  $\mu\text{m}$ .



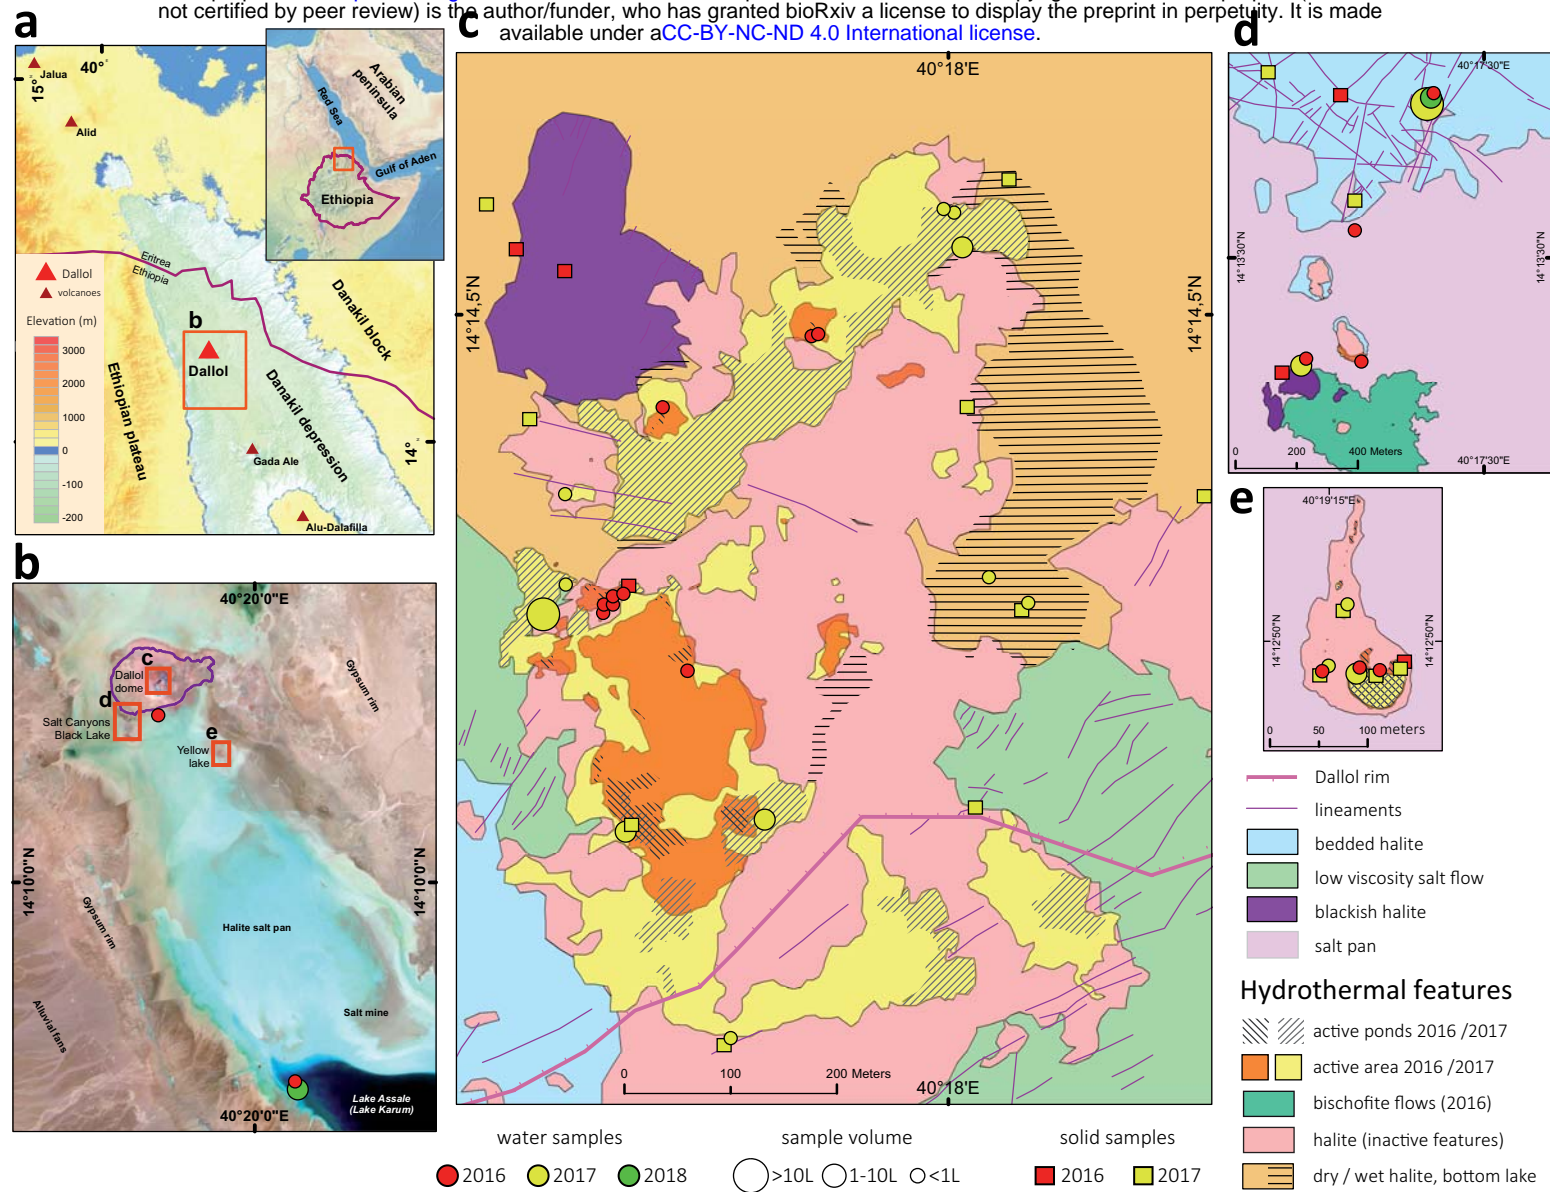

Figure 1. Belilla et al.

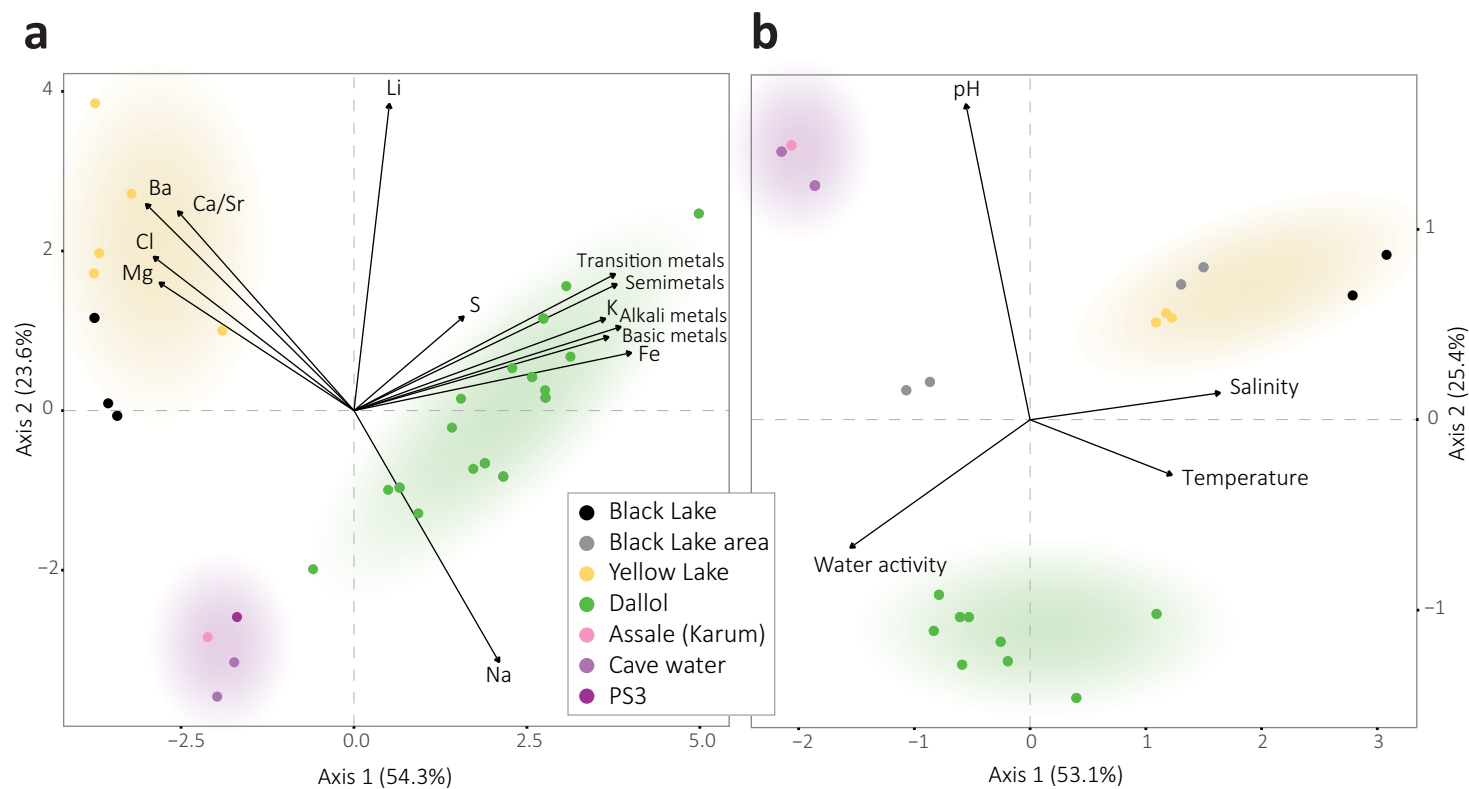

Figure 2. Belilla et al.

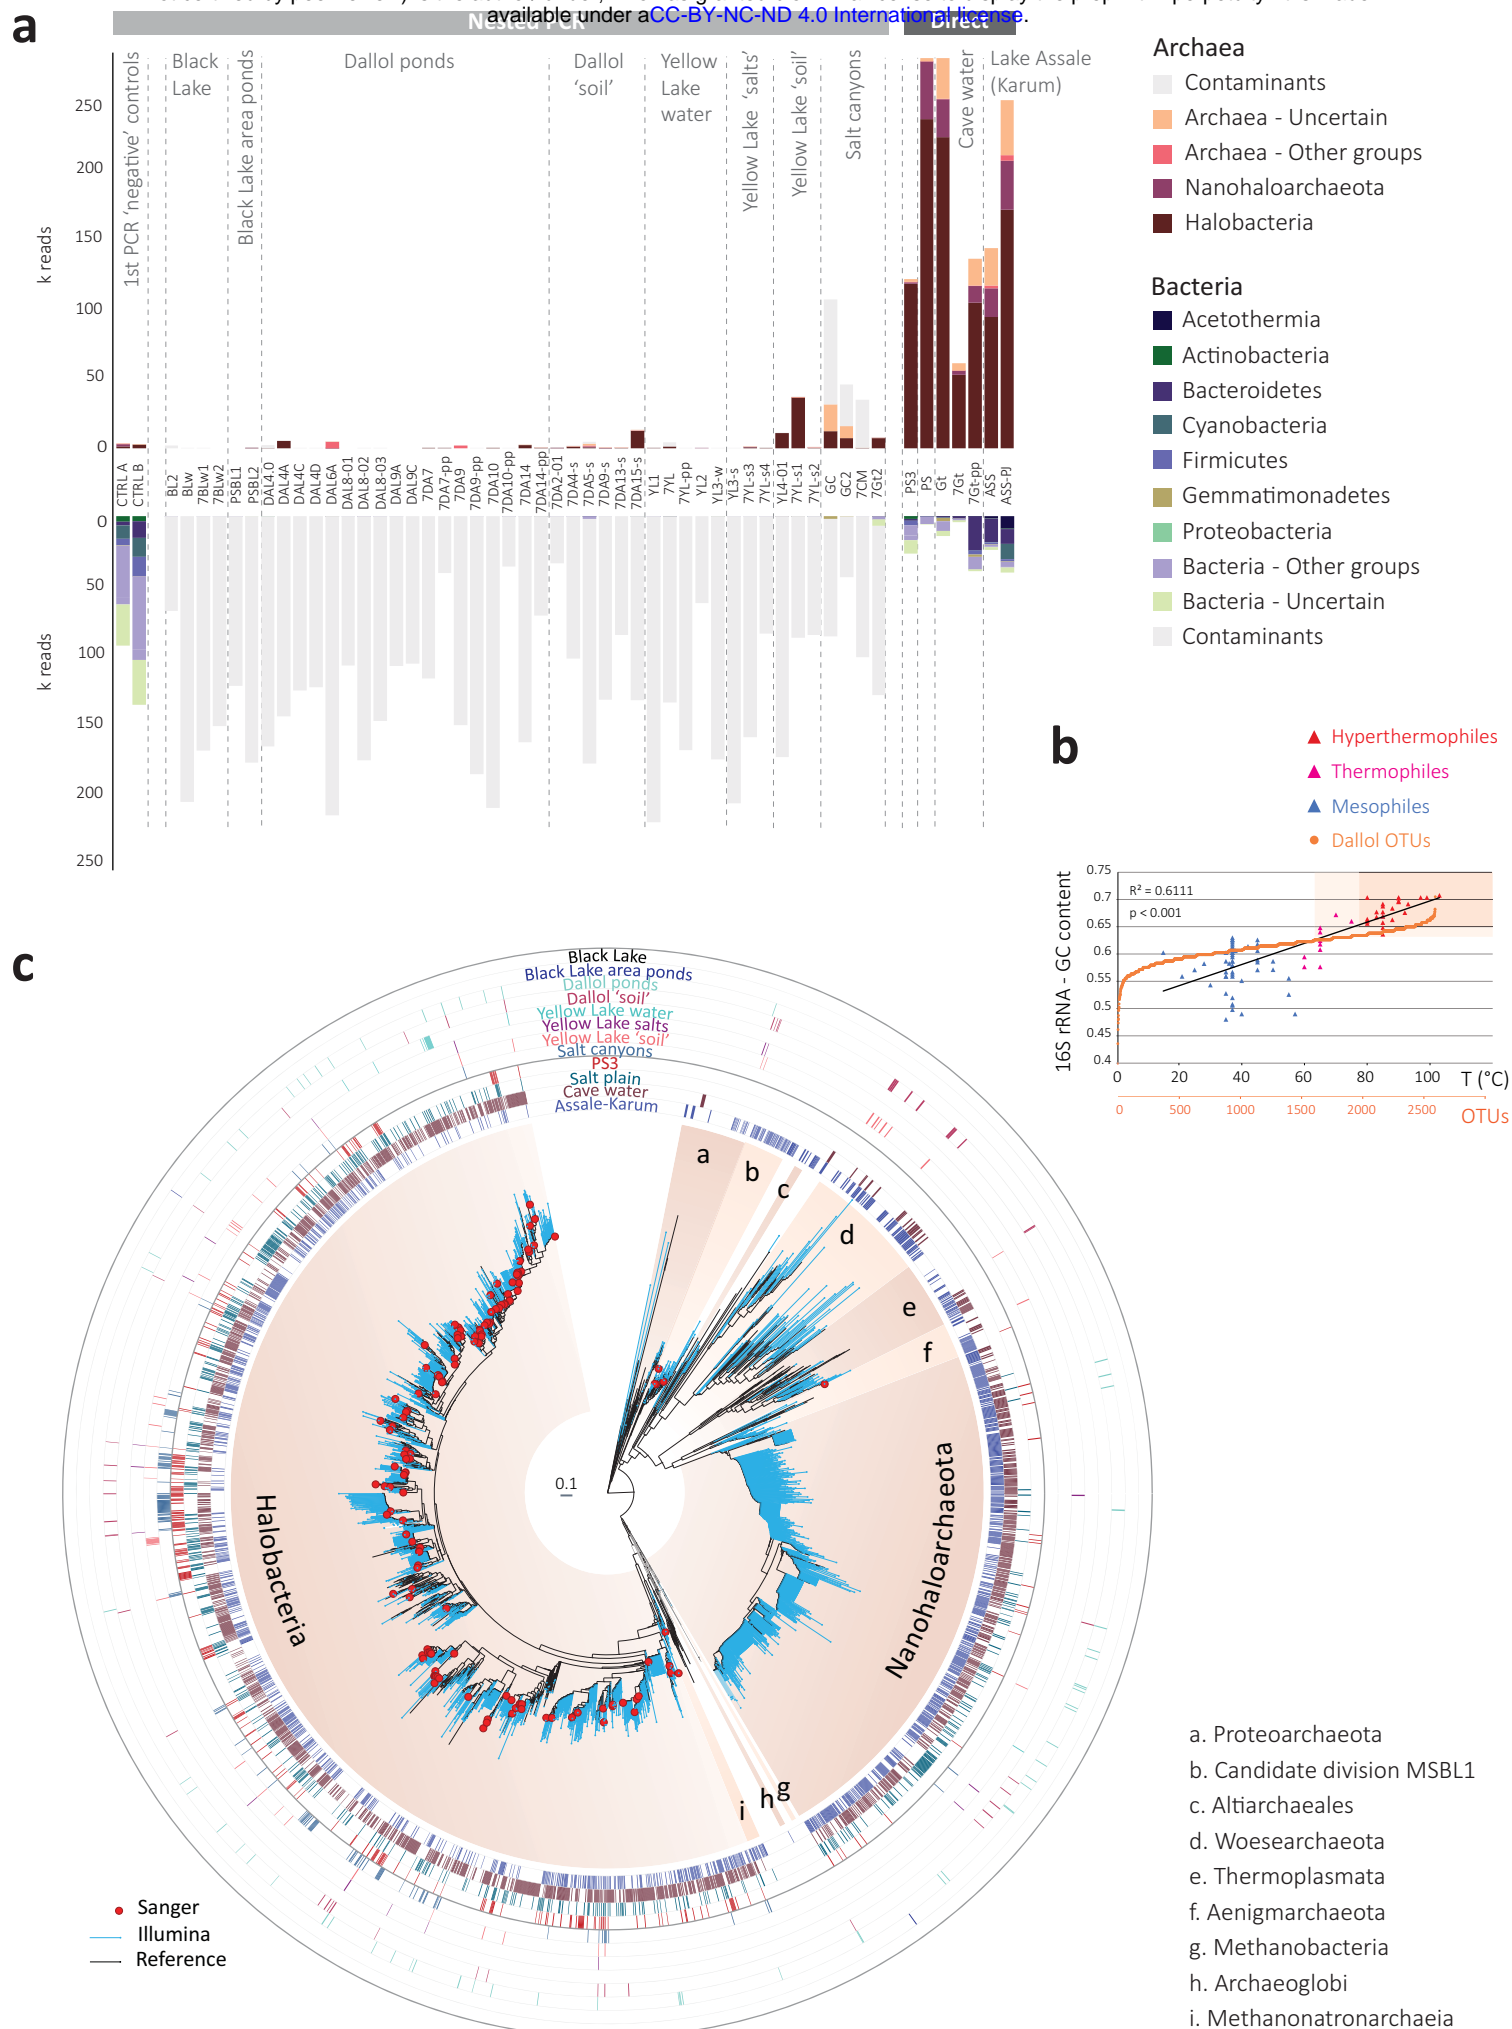



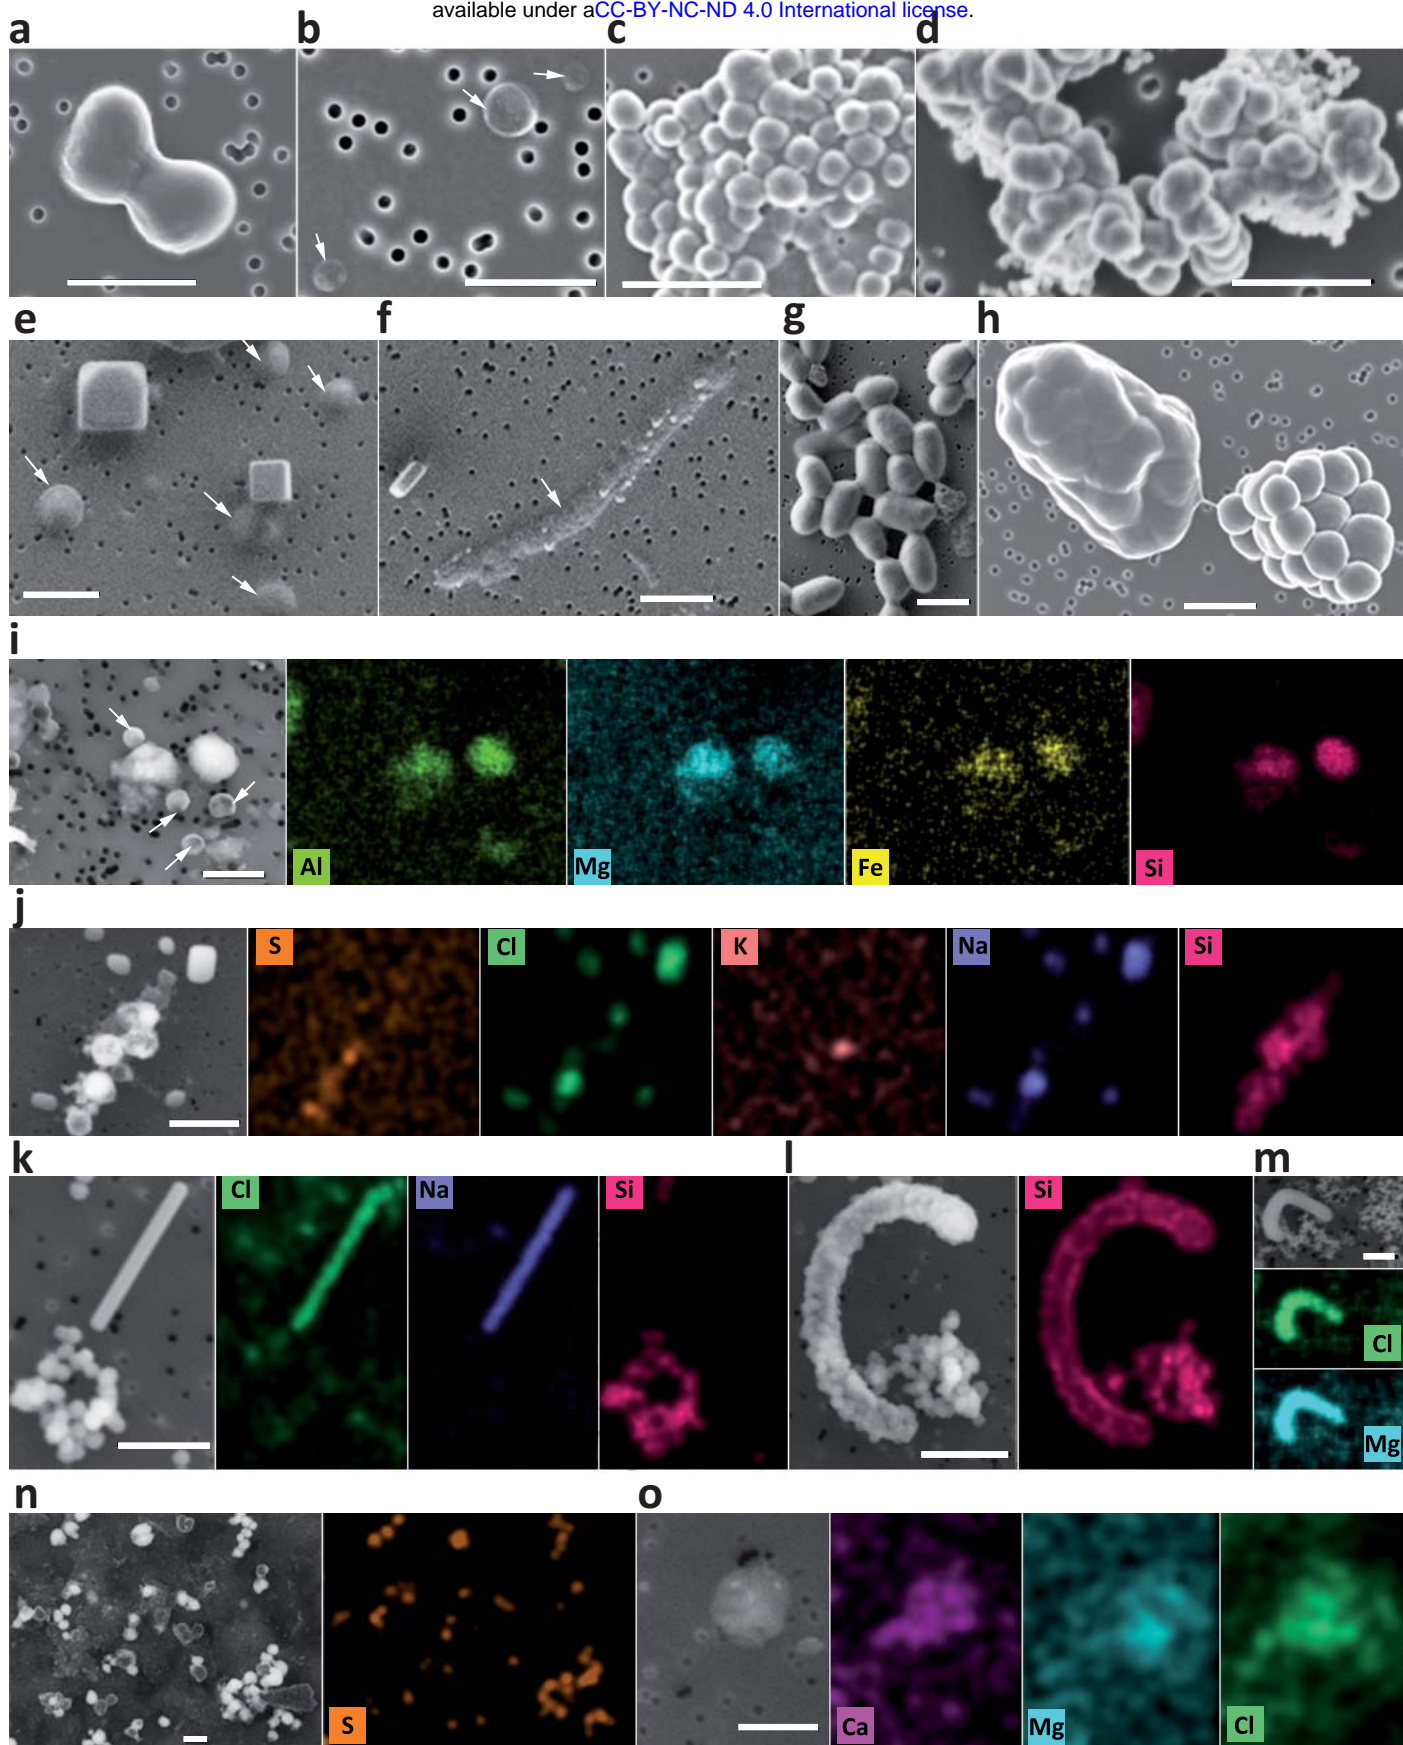

Figure 4. Belilla et al.
