# Supplementary material for: Hyperdiverse archaea near life limits at the polyextreme geothermal Dallol area
Source: bioRxiv or medRxiv preprint supplement (doi:10.1101/658211), 2019-07-28
Supplement: Supplementary file [file media-1.pdf]

Supplementary Materials for  
**Hyperdiverse archaea near life limits at the polyextreme geothermal  
Dallol area**

**Jodie Belilla, David Moreira, Ludwig Jardillier, Guillaume Reboul, Karim Benzerara, José M. López-García, Paola Bertolino, Ana I. López-Archilla & Purificación López-García\*.**

Correspondence to: [puri.lopez@u-psud.fr](mailto:puri.lopez@u-psud.fr)

**This PDF file includes:**

Figs. S1 to S6  
Tables S1 to S5

**Other Supplementary Materials for this manuscript include the following:**

Data S1 to S7

**Data S1.** (Table) Organic and ionic chromatography analysis of samples from the Dallol dome and surrounding area.

**Data S2.** (Table) Identification, phylogenetic affinity and relative abundance of prokaryotic OTUs.

**Data S3.** Identification, phylogenetic affinity and relative abundance of eukaryotic OTUs from Dallol area samples.

**Data S4.** Full tree of archaeal 16S rRNA gene fragments in Newick format.

**Data S5.** Full tree of bacterial 16S rRNA gene fragments in Newick format.

**Data S6.** Chemical maps obtained from energy dispersive X-ray spectrometry (EDXS) combined to SEM observations of cells and abiotic biomorphs observed in the Dallol area and Lake Assale (Karum).

**Data S7.** Energy dispersive X-ray spectrometry (EDXS) spectra of different structures observed in samples from the Dallol area.

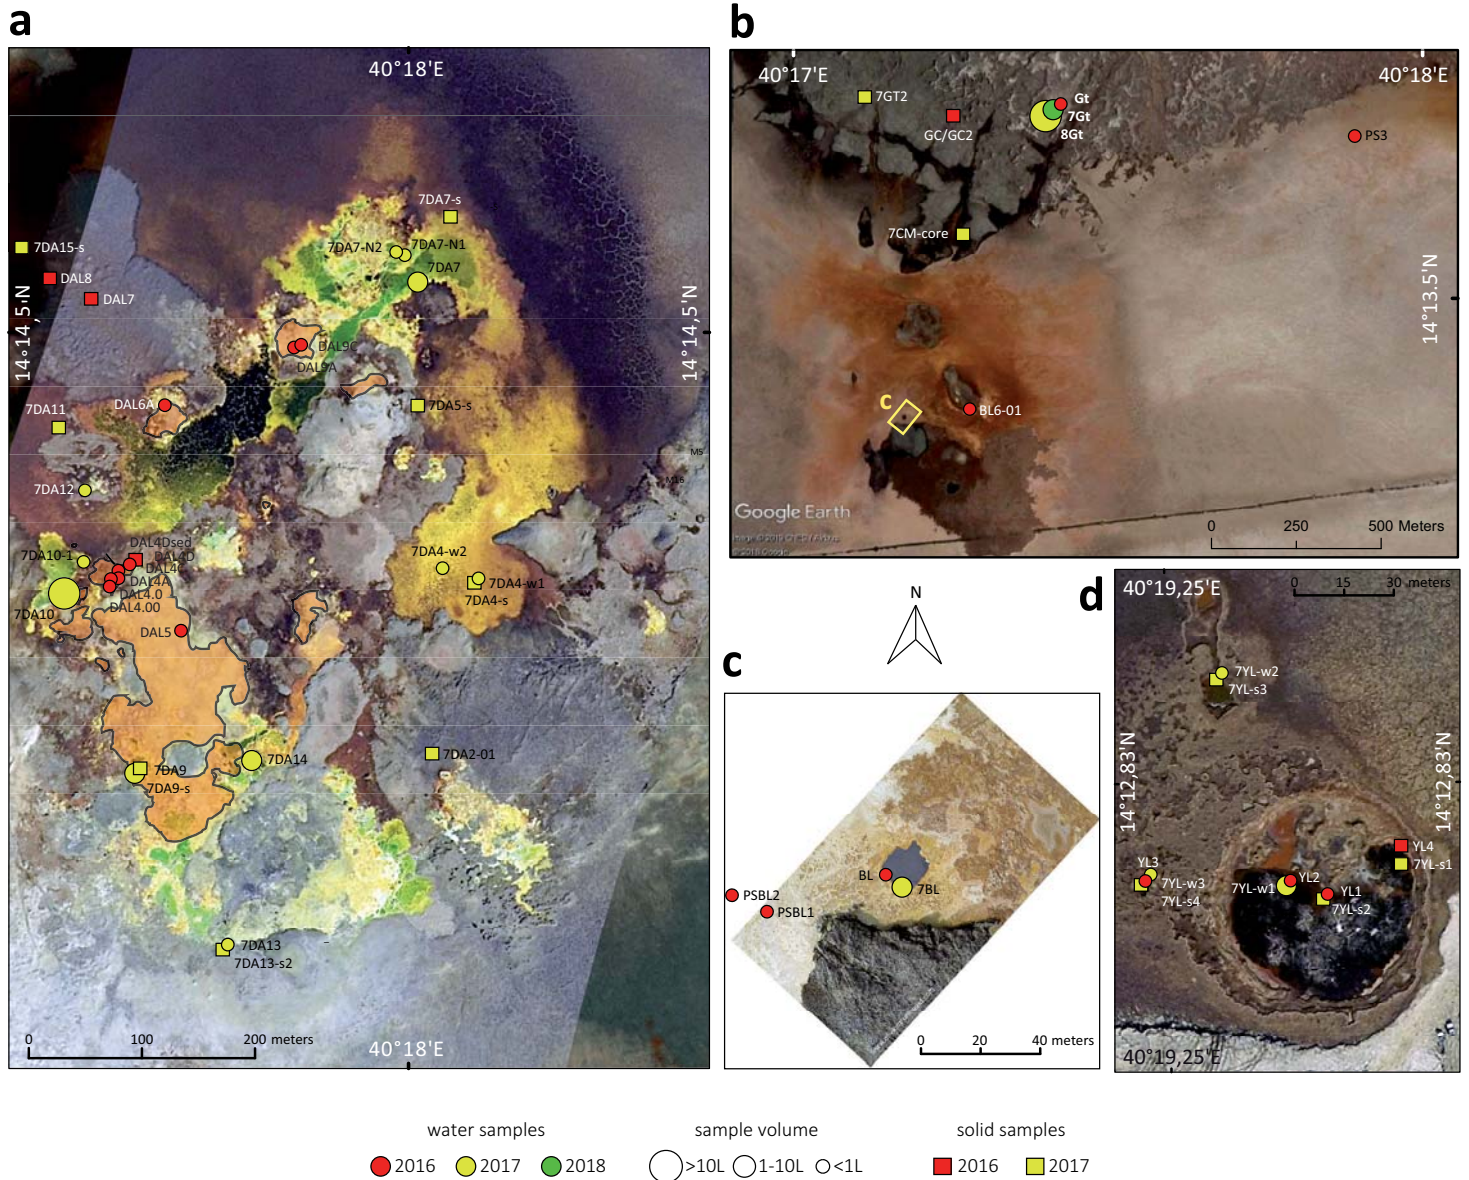

**Fig. S1. Aerial view of the main sampling sites in the Dallol area.** **a**, Dallol dome summit showing the acidic green-yellow-brown colored hydrothermal ponds and active degassing areas during our 2017 sampling trip; the orange-shaded area shows the active hydrothermal zone in January 2016. **b**, Dallol West salt canyons and Black Mountain area. **c**, Black Lake. **d**, Yellow Lake and surroundings. Names of samples and sampling sites are indicated. The size of circles is proportional to the water volume collected or filtered for subsequent analyses. Aerial photographs were taken from a drone by O. Grunewald, except b, which is a Google Earth aerial image (09/03/2016) provided by Image © 2019 CNES/Airbus.

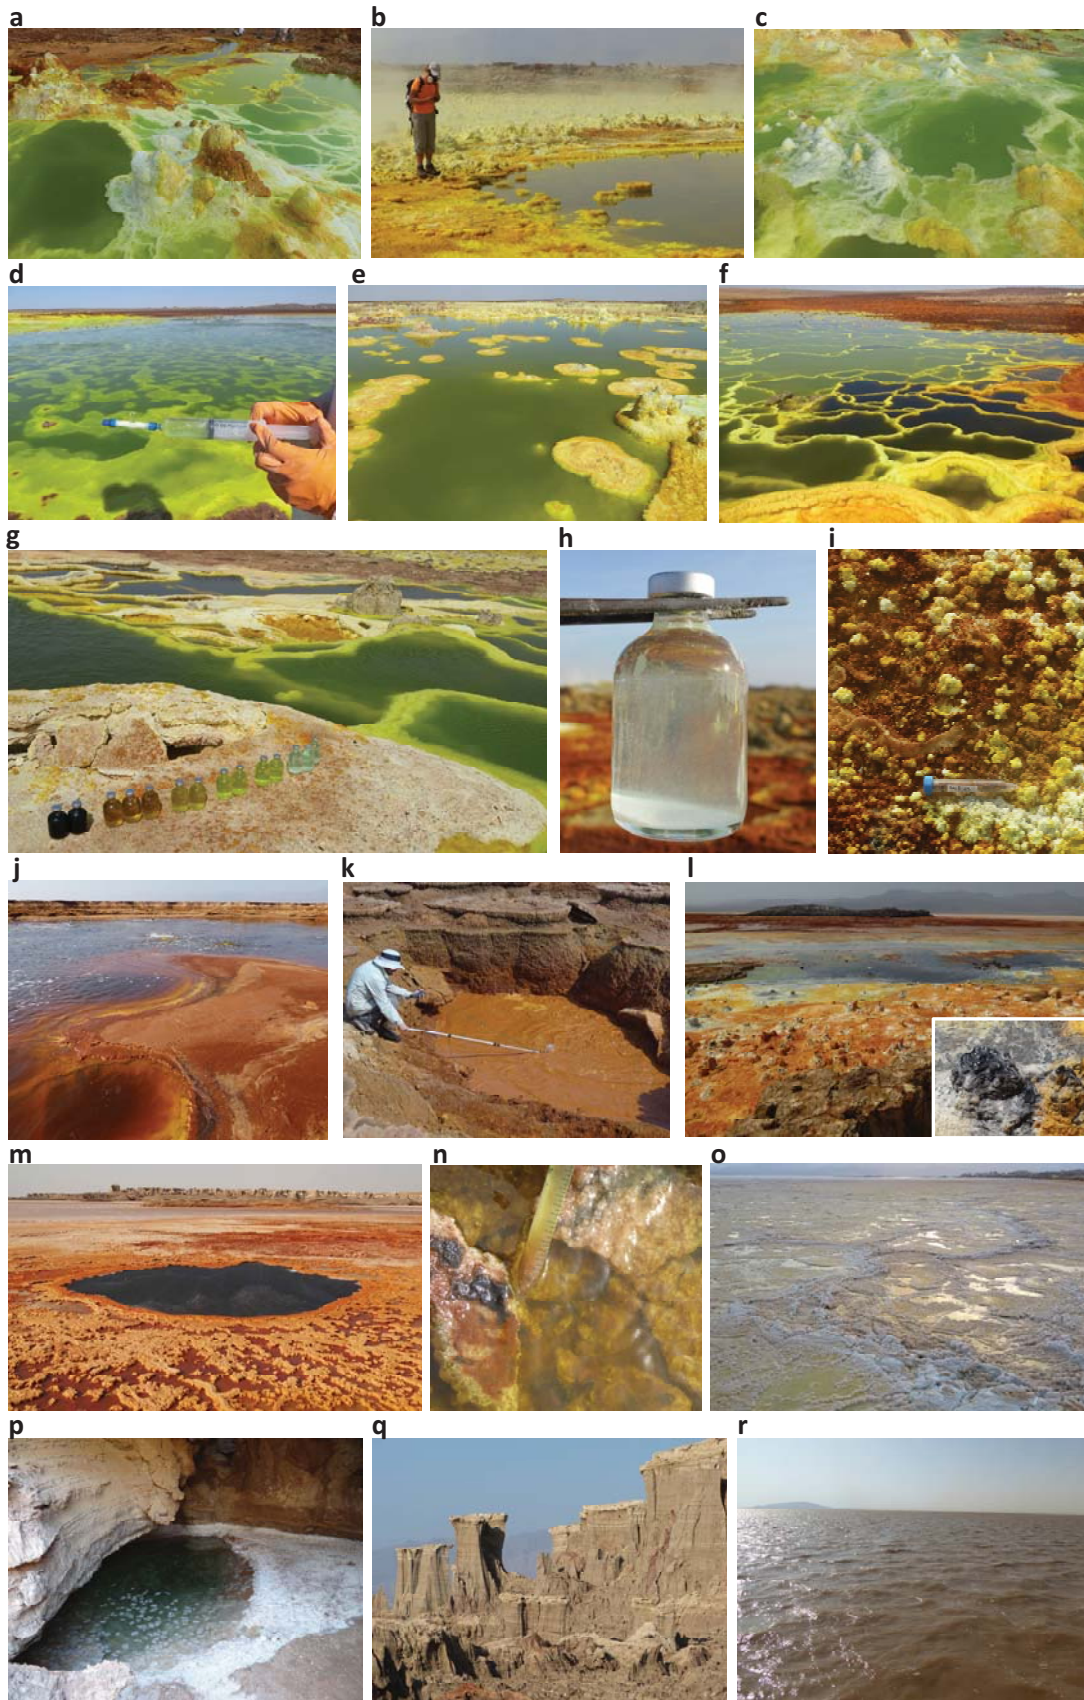

**Fig. S2. Views of different sampling sites in the Dallol dome and surroundings in the Danakil Depression.** **a**, DAL4 sampling site ponds; **b**, DAL5 pond and active degassing area; **c**, active hydrothermal springs in DAL9 ponds; **d**, in situ cell-trap filtration at the 7DA7 sampling area; **e**, 7DA9 sampling site; **f**, 7DA10 ponds showing increasingly darker and brownish colors along the oxidation gradient; **g**, water samples from the different 7DA10 ponds; **h**, immediate precipitation of halite crystals as water collected from a hot spring (108°C) cools down upon collection; **i**, DAL8 mineral precipitates; **j**, Yellow Lake showing active degassing; **k**, YL3, salt-mud volcano in the Yellow Lake area; **l**, 'Little Dallol' hydrothermal very active area in 2016 on the way to the Black Mountain (in the distance; inlet, chimney emitting hydrocarbon-rich fluids at 110°C); **m**, Black Lake; **n**, PSBL2 (Black Lake area ponds); **o**, wet salt plain, influenced by hydrothermal activity, corresponding to PS3 sample area; **p**, the cave in the salt canyons where Gt, 7Gt and 8Gt samples were collected; **q**, salt canyons; **r**, Assale (Karum) lake. Sample names starting by 7 indicate collection in 2017. Pictures from all other samples/sampling sites were taken during the 2016 expedition.

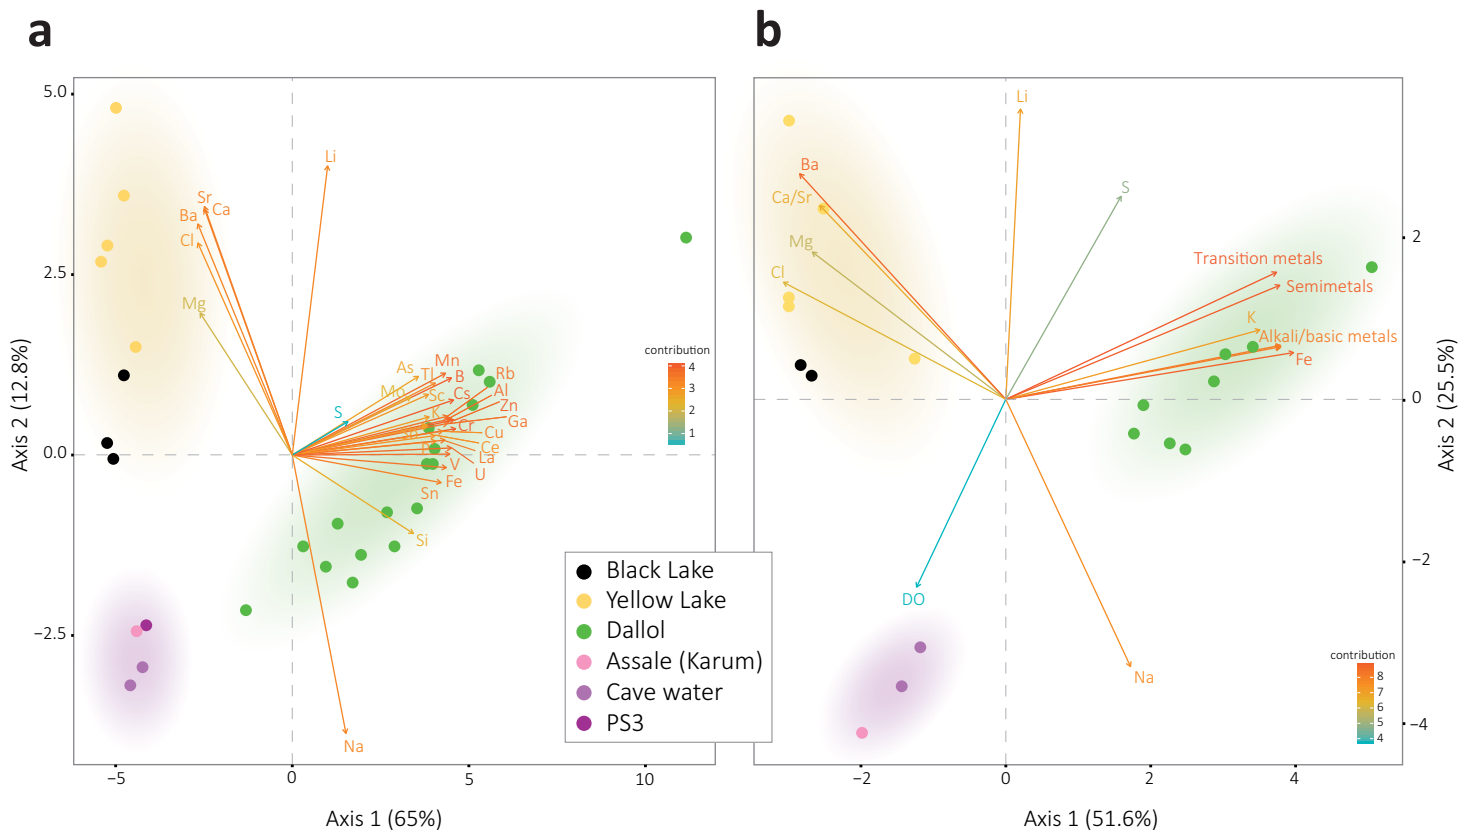

**Fig. S3. Principal Component Analyses (PCA) of Dallol area sampling sites as a function of physicochemical parameters.** PCA of 29 samples according to their chemical composition; only relatively abundant elements (see Extended Data Table 2) are included in the analysis. A summary of this analysis is shown in Fig. 2a. **b**, PCA including the same variables as Fig. 2a but additionally including dissolved oxygen (DO). Measured parameters on site can be found in Extended Data Table 1.

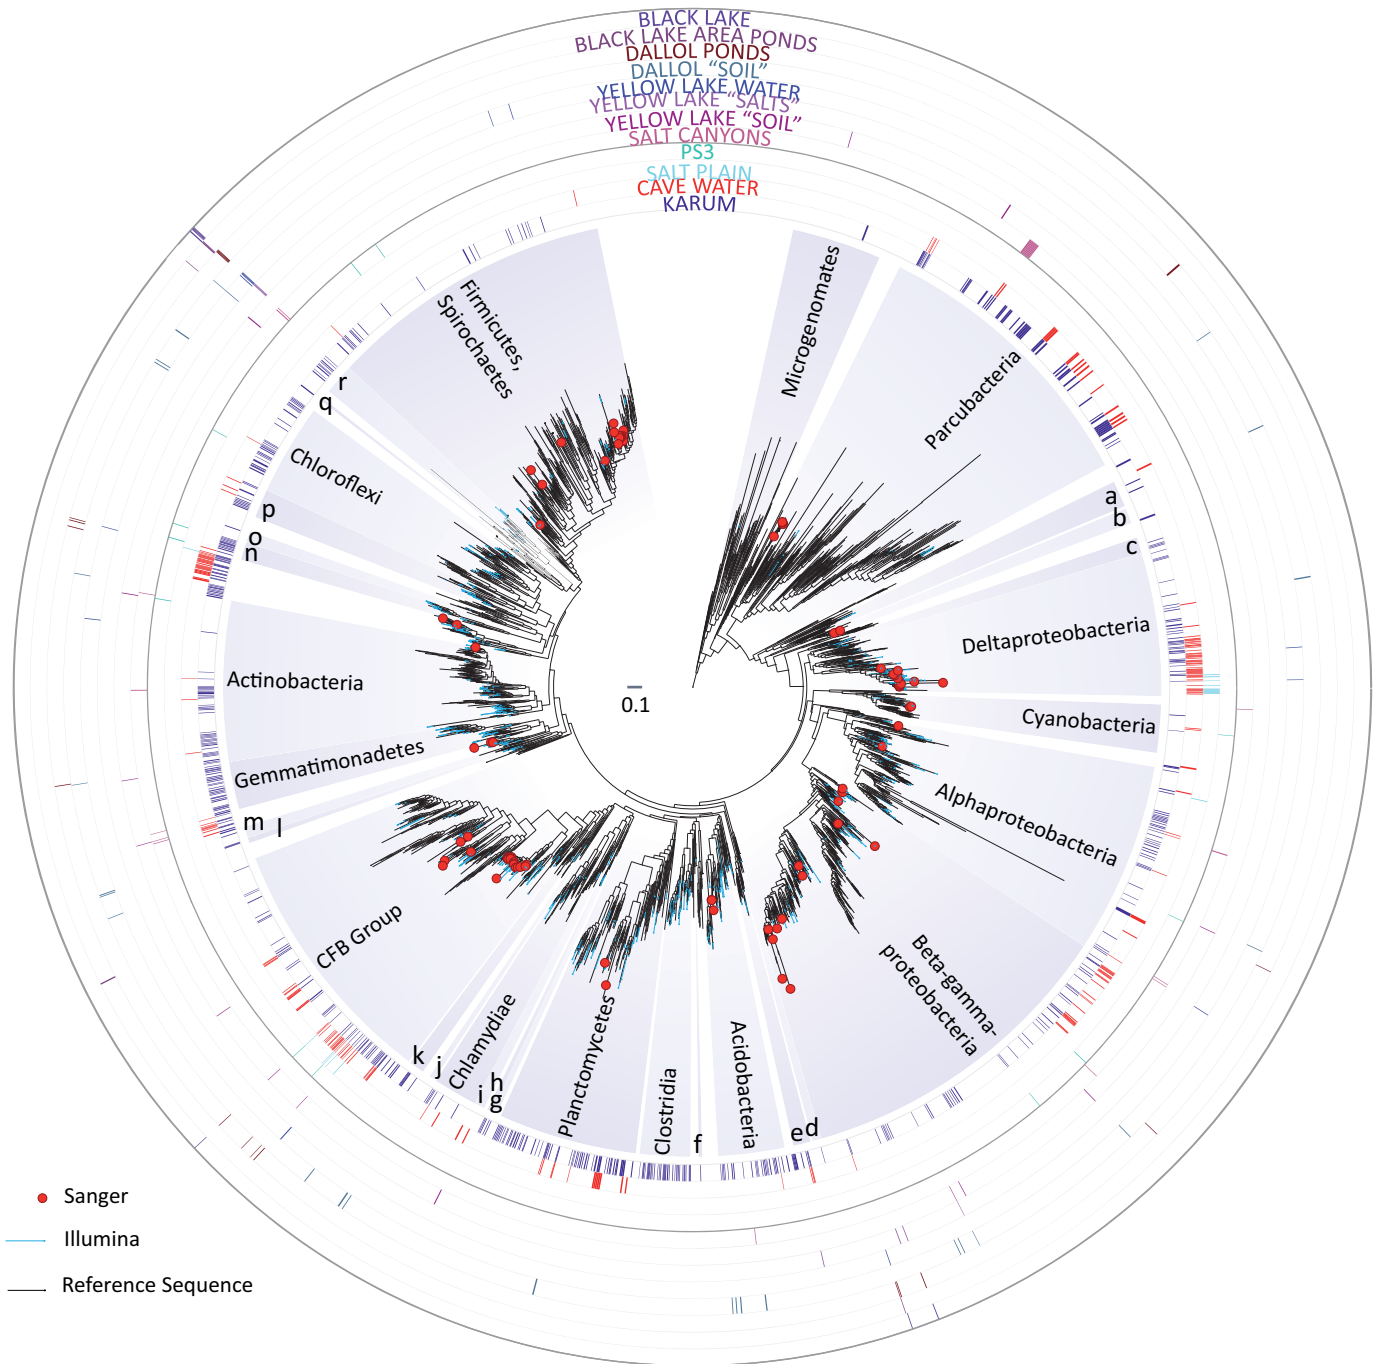

- a. Peregrinibacteria
- b. Saccharibacteria
- c. Desulfovibrionales
- d. Deferribacteres
- e. Candidate division TM6
- f. Candidate division NC10
- g. Candidatus Latescibacteria

- h. Candidatus BRC1
- i. Omnitrophica
- j. Zixibacteria
- k. Marinimicrobia
- l. Rokubacteria
- m. Nitrospirae

- n. Acetothermia
- o. Synergistetes
- p. Armatimonadetes
- q. Dadabacteria
- r. Deinococcus-Thermus

**Fig. S4. Phylogenetic tree of bacterial 16S rRNA gene sequences showing the phylogenetic placement of OTUs identified in the different Dallol area samples.** Sequences derived from metabarcoding studies are represented by blue lines (Illumina sequences); those derived from cloning and Sanger sequencing of environmental samples, cultures and FACS-sorted cells are labelled with a red dot. Reference sequences are in black. Concentric circles around the tree indicate the presence/absence of the corresponding OTUs in different groups of samples (groups shown in Fig.3a). Only sequences not deemed contaminant (see Supplementary Data S2) were included in the tree. The full tree is provided as Supplementary Data S5.

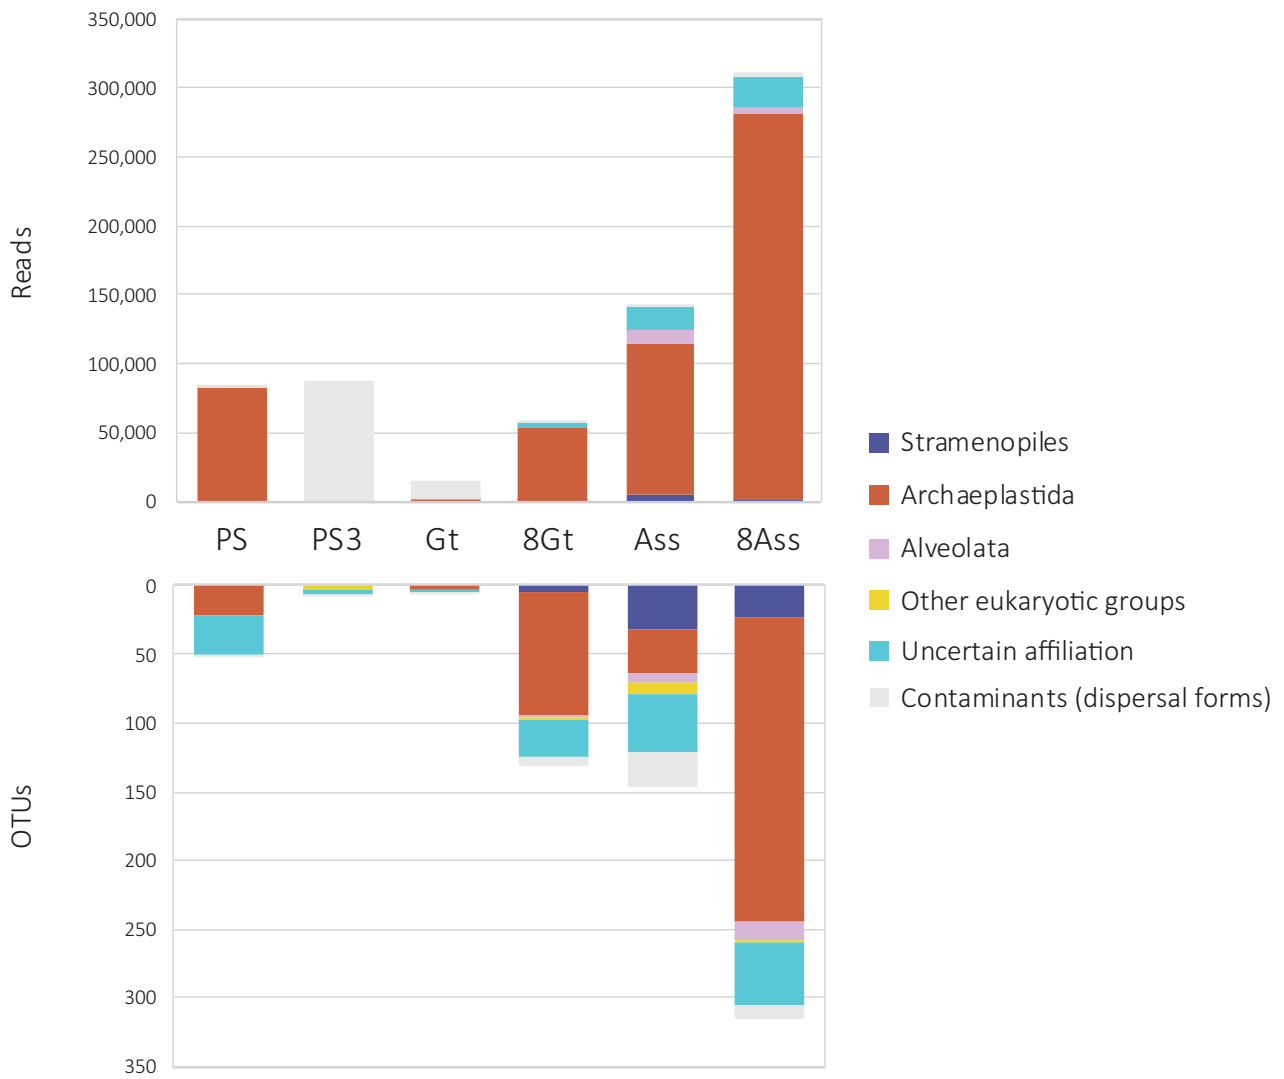

**Fig. S5. Eukaryotic presence, diversity and relative abundance in Dallol area samples.** Histogram showing the phylogenetic affiliation and abundance of 18S rRNA gene amplicon reads of eukaryotes (upper panel) obtained with universal eukaryotic primers and the associated OTU diversity (lower panel). Only a few samples yielded amplicons; negative PCR controls were always negative. Sequences corresponding to macroscopic plants and fungi (probably derived from pollen or spores) were considered contaminant (light grey). The phylogenetic affiliation of dominant eukaryotic groups is color-coded.

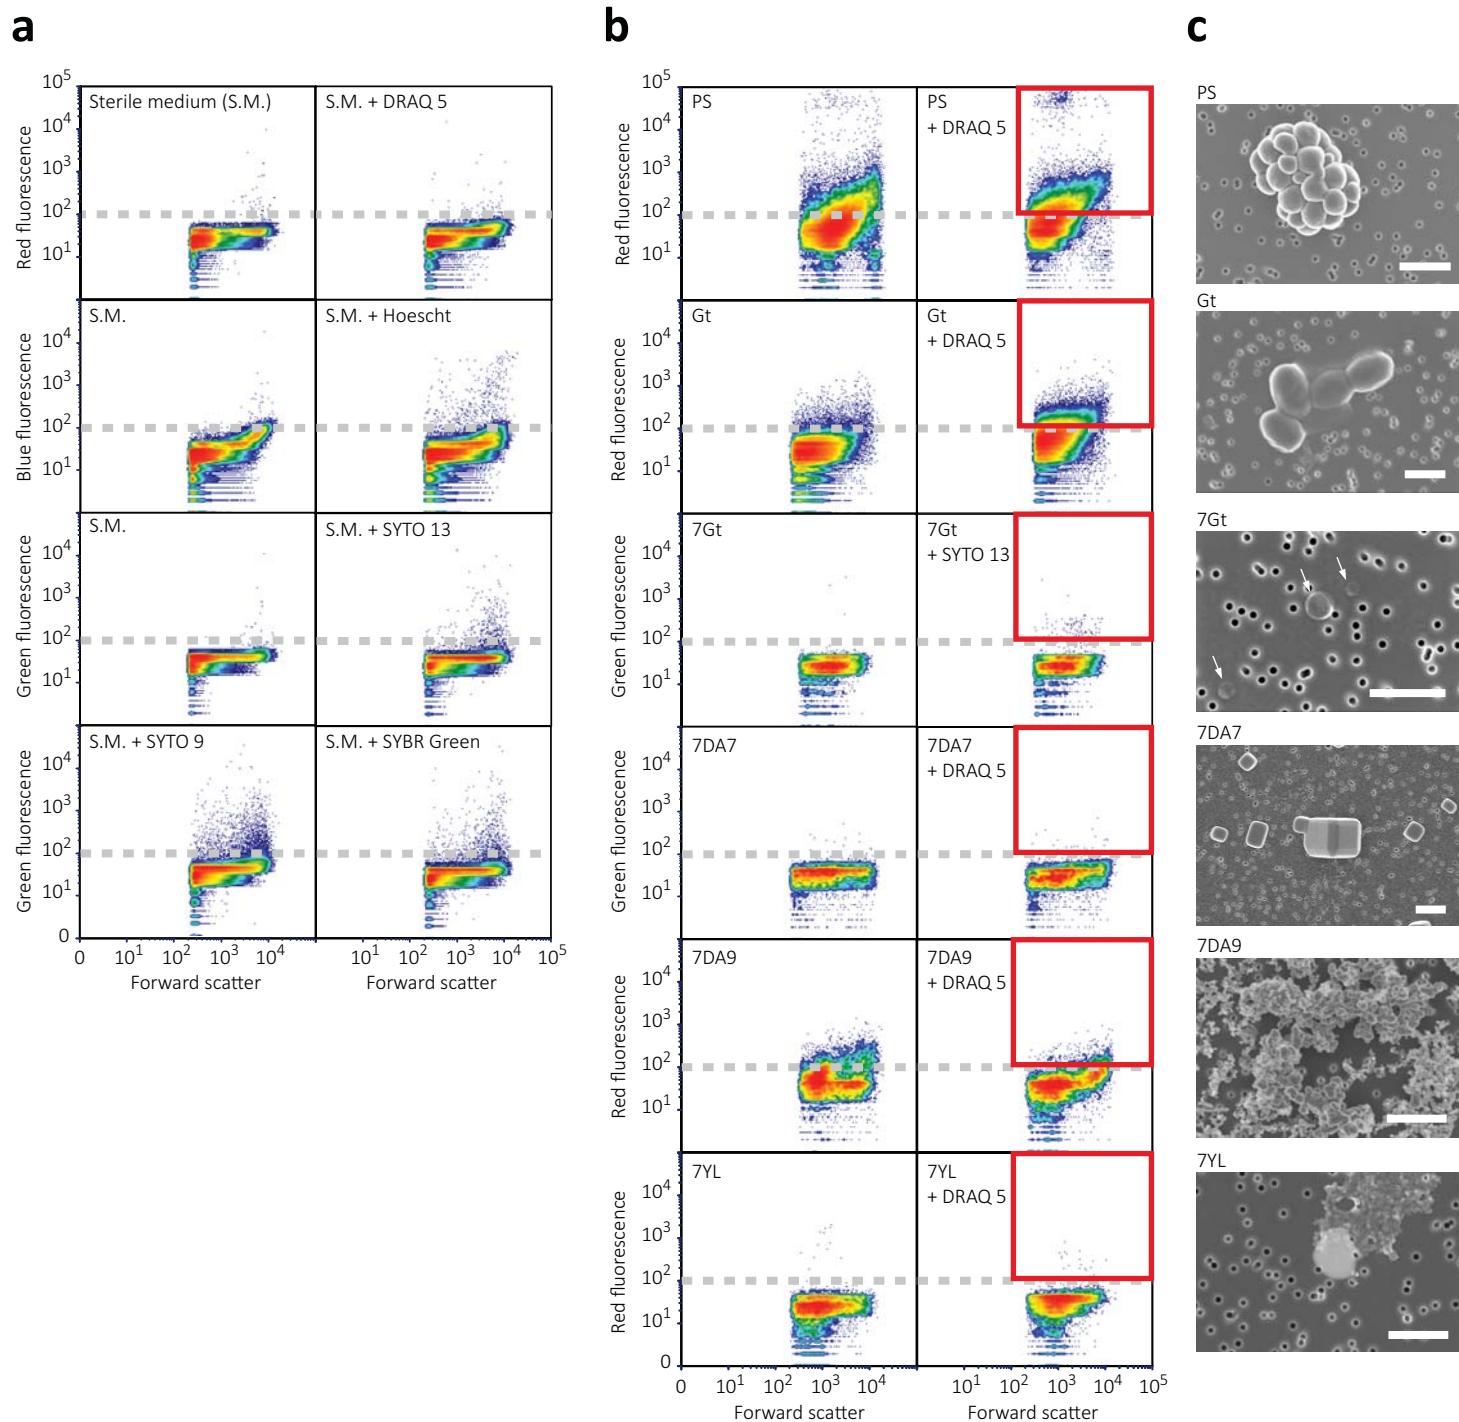

**Fig. S6. Multiparametric fluorescence analyses and fluorescence-activated cell sorting (FACS) analyses of representative Dallol area samples. a**, effect of DNA fluorescent dyes on background fluorescence emission; natural (left panels) and DNA dye-induced (right panels) fluorescence in the sterile hypersaline SALT-YE medium used to dilute/sort Dallol samples. Fluorescence is plotted against the size of the analyzed particles (forward scatter); events concentration is color-coded, red being high concentration and blue, low concentration. DRAQ 5 and SYTO 13 introduced less background and were chosen for FACS of natural samples. The approximate background threshold (ca. 102) is indicated by a broken grey line. **b**, multiparametric fluorescence analyses of different Dallol samples before (left panels) and after (right panels) adding fluorescent DNA dyes. Events (particles) above background (red squares) were FACS-sorted and filtered on 0.1  $\mu\text{m}$  pore-size filters prior to SEM observations. **c**, SEM photographs showing examples of sorted particles. Cells are observed in samples PS, Gt and 7Gt; halite crystals in 7DA7 and amorphous mineral particles in 7DA9 and 7YL. Arrows indicate ultrasmall cells. The scale bar is 1  $\mu\text{m}$ .

**Table S1. List and description of samples from the Dallol area analyzed in this study and type of analyses performed.** DO, dissolved oxygen; ORP, oxido-reduction potential;  $a_w$ , water activity. SEM/XRD, scanning electron microscopy/x-ray diffraction analyses; FACS, fluorescence-activated cell sorting analysis; n.a., not applicable; n.d. not determined.

| Color of ponds or solid samples       | Sample name        | Coordinates                | Collection date | Brief description                                                                               | Sample type / volume |             |                                      | Physicochemical parameters |       |        |           |          |                           |       | Type of analyses |                     |                |                             |         |      |   |   |   |
|---------------------------------------|--------------------|----------------------------|-----------------|-------------------------------------------------------------------------------------------------|----------------------|-------------|--------------------------------------|----------------------------|-------|--------|-----------|----------|---------------------------|-------|------------------|---------------------|----------------|-----------------------------|---------|------|---|---|---|
|                                       |                    |                            |                 |                                                                                                 | Solid                | Liquid (ml) | 0.2-30 µm fraction (ml) <sup>a</sup> | Temp (°C)                  | pH    | DO (‰) | DO (mg/l) | ORP (mV) | Salinity (‰) <sup>b</sup> | $a_w$ | Chemistry        | Cloning/Sanger seq. | Meta-barcoding | Culture assays <sup>c</sup> | SEM/XRD | FACS |   |   |   |
| <b>Dallol hydrothermal ponds</b>      |                    |                            |                 |                                                                                                 |                      |             |                                      |                            |       |        |           |          |                           |       |                  |                     |                |                             |         |      |   |   |   |
|                                       | DAL4.00            | 14.23916N<br>04.297059E    | 16.01.2016      | Hydrothermal fluid from a salt chimney feeding cascading ponds along redox gradient site DAL4   |                      | 50          | 1000                                 | 108.0                      | n.d.  | n.d.   | n.d.      | n.d.     | 30.0                      | 0,719 |                  | X                   | X              |                             |         |      |   |   |   |
|                                       | DAL4.0             | 14.23923N<br>04.29707E     | 17.01.2016      | Warm whitish green pond in the redox pond series DAL4                                           |                      | 50          | 1000                                 | 46.3                       | -0.43 | 0.55   | 0.03      | 328.95   | 21.0                      | n.d.  | X                | X                   | X              |                             | Y       | X    |   |   |   |
|                                       | DAL4A              | 14.23921N<br>04.29713E     | 17.01.2016      | Bright green pond in the redox pond series DAL4                                                 |                      | 50          | 1000                                 | 30.5                       | -0.53 | 3.05   | 0.26      | 366.8    | 22.0                      | n.d.  | X                | X                   | X              |                             | Y       | X    |   |   |   |
|                                       | DAL4C              | 14.23967N<br>04.29744E     | 16.01.2016      | Brownish green pond in the redox pond series DAL4                                               |                      |             | 1000                                 | 31.6                       | -0.95 | 1      | 0.08      | 384.05   | 21.5                      | n.d.  |                  | X                   | X              |                             | Y       |      |   |   |   |
|                                       | DAL4D              | 14.23938N<br>04.29728E     | 16.01.2016      | Dark brown pond along an oxidation gradient, DAL4 site                                          |                      | 50          | 1000                                 | 31.0                       | -0.72 | 1.4    | 0.11      | 381.55   | n.d.                      | n.d.  | X                | X                   | X              |                             | Y       | X    |   |   |   |
|                                       | DAL 4D-SED         | 14.23934N<br>04.29728E     | 16.01.2016      | Yellow salt front forming pond wall                                                             | X                    |             |                                      | n.a.                       | n.a.  | n.a.   | n.a.      | n.a.     | n.a.                      | n.d.  | X                | X                   |                |                             |         |      |   |   |   |
|                                       | DAL 5              | 14.23869N<br>04.29776E     | 17.01.2016      | Yellow water from one big Dallol pond                                                           |                      | 50          |                                      | 42.6                       | -0.93 | 3.4    | 0.19      | 373.3    | 40                        | n.d.  |                  |                     |                |                             |         |      |   | Y |   |
|                                       | DAL6A              | 14.24085N<br>04.29756E     | 18.01.2016      | Fluid from a salt chimney feeding various ponds along an oxidation gradient, site DAL6          |                      | 50          | 1000                                 | 108.4                      | -0.65 | n.d.   | n.d.      | n.d.     | n.d.                      | n.d.  | X                | X                   | X              |                             | Y       |      |   |   |   |
|                                       | DAL 7              | 14.24234N<br>04.29679E     | 18.01.2016      | Sulfur-colored mineral precipitates on "chocolate formation"                                    | X                    |             |                                      | n.a.                       | n.a.  | n.a.   | n.a.      | n.a.     | n.a.                      | n.d.  |                  |                     |                |                             |         |      |   | Y |   |
|                                       | DAL8-01            | 14.24217N<br>04.29635E     | 20.01.2016      | Yellow, potentially sulfur-rich precipitates                                                    | X                    |             |                                      | n.a.                       | n.a.  | n.a.   | n.a.      | n.a.     | n.a.                      | n.d.  |                  | X                   | X              |                             | Y       |      |   |   |   |
|                                       | DAL8-02            | 14.24217N<br>04.29635E     | 20.01.2016      | Golden, potentially sulfur-rich salt precipitates                                               | X                    |             |                                      | n.a.                       | n.a.  | n.a.   | n.a.      | n.a.     | n.a.                      | n.d.  |                  | X                   | X              |                             |         |      |   |   |   |
|                                       | DAL8-03            | 14.24217N<br>04.29635E     | 20.01.2016      | Brown, potentially sulfur-rich salt precipitates                                                | X                    |             |                                      | n.a.                       | n.a.  | n.a.   | n.a.      | n.a.     | n.a.                      | n.d.  |                  | X                   | X              |                             |         |      |   |   |   |
|                                       | DAL9A              | 14.24150AN<br>04.298836E   | 21.01.2016      | Large light green bubbling pond with various hydrothermal sources; site DAL9                    |                      | 50          | 650                                  | 37.9                       | -0.27 | n.d.   | n.d.      | n.d.     | n.d.                      | n.d.  | X                | X                   | X              |                             | Y       |      |   |   |   |
|                                       | DAL9C              | 14.24151N<br>04.298874E    | 21.01.2016      | Smaller deep green hydrothermal pond at the DAL9 site                                           |                      | 50          | 750                                  | 56.0                       | -0.20 | n.d.   | n.d.      | n.d.     | n.d.                      | n.d.  | X                | X                   | X              |                             | Y       |      |   |   |   |
|                                       | 7DA2-01            | 14.24276E<br>04.300633E    | 06.01.2017      | Grey cauliflower-like mineral precipitates                                                      | X                    |             |                                      | n.a.                       | n.a.  | n.a.   | n.a.      | n.a.     | n.a.                      | n.d.  |                  | X                   | X              |                             |         |      |   |   |   |
|                                       | 7DA4-w1            | 14.239406N<br>04.300419E   | 10.01.2017      | Grey-brownish water from a drying pond formed by yellow-colored salt                            |                      | 100         |                                      | 27.9                       | -0.73 | 3.8    | 0.13      | 416.1    | 44                        | 0.667 | X                |                     |                |                             |         |      |   |   |   |
|                                       | 7DA4-w2            | 14.239892N<br>04.300106E   | 10.01.2017      | Slightly lighter water from the same kind of pool as 7DA4-w1                                    |                      | 100         |                                      | 27.0                       | -0.72 | 2.9    | 0.09      | 420.1    | 40                        | 0.698 | X                |                     |                |                             |         |      |   |   |   |
|                                       | 7DA4-s             | 14.239406N<br>04.300419E   | 10.01.2017      | Fresh, yellow cauliflower-like mineral precipitates near 7DA4-w2                                | X                    |             |                                      | n.a.                       | n.a.  | n.a.   | n.a.      | n.a.     | n.a.                      | n.d.  |                  | X                   | X              |                             |         |      |   |   |   |
|                                       | 7DA5-s             | 14.240908N<br>04.300119E   | 10.01.2017      | Brown (oxidized), fluid-impregnated cauliflower-like mineral precipitates                       | X                    |             |                                      | n.a.                       | n.a.  | n.a.   | n.a.      | n.a.     | n.a.                      | n.d.  | X                | X                   | X              |                             |         |      |   |   |   |
|                                       | 7DA7               | 14.24216N<br>04.300102E    | 07.01.2017      | Water from an active green large pond fed by multiple hydrothermal springs                      |                      | 500         | 3000                                 | 19.7                       | -0.55 | 4.1    | 0.16      | 371.9    | 47                        | 0.694 |                  | X                   | X              |                             | X       | X    | X | X | X |
|                                       | 7DA7-s             | 14.2428N<br>04.300494E     | 10.01.2017      | Brown salt crust East to 7DA7 active site on a drying pond covering a layer of wet yellow salt  | X                    |             |                                      | n.a.                       | n.a.  | n.a.   | n.a.      | n.a.     | n.a.                      | n.d.  | X                |                     |                |                             |         |      |   |   |   |
|                                       | 7DA7N-1            | 14.242381N<br>04.299992E   | 10.01.2017      | Bluish hot pond on the northern terrace feeding 7DA7                                            |                      | 50          |                                      | 44.6                       | -0.33 | 5.7    | 0.16      | 271.2    | 40.0                      | 0.694 | X                |                     |                |                             |         |      | Y |   |   |
|                                       | 7DA7N-2            | 14.242381N<br>04.299992E   | 10.01.2017      | Hotter, greenish pond adjacent to 7DA7N-1                                                       |                      | 50          |                                      | 68.0                       | n.d.  | n.d.   | n.d.      | n.d.     | 37.0                      | 0.698 | X                |                     |                |                             |         |      |   |   |   |
|                                       | 7DA9               | 14.241528N<br>04.29884E    | 08.01.2017      | Large pond in active degassing area with many white-yellowish chimneys and salt nenuphars       |                      | 500         | 6000                                 | 31.9                       | -0.34 | 5.5    | 0.16      | 369      | 43                        | 0.708 | X                |                     | X              | X                           |         | X    | X | X | X |
|                                       | 7DA9-s             | 14.241532N<br>04.29884E    | 08.01.2017      | Centric round-shaped salt and sulfur formations in a dry pond next to 7DA9                      | X                    |             |                                      | n.a.                       | n.a.  | n.a.   | n.a.      | n.a.     | n.a.                      | n.d.  |                  | X                   | X              |                             |         |      |   |   |   |
|                                       | 7DA10              | 14.23908N<br>04.296598E    | 09.01.2017      | Upper green pond in a well-marked terrace system along an oxidation gradient                    |                      | 100         | 14700                                | 55.2                       | -0.08 | 2.2    | 0.05      | 321.8    | 35.0                      | 0.714 | X                | X                   | X              |                             |         |      |   |   |   |
|                                       | 7DA10-1            | 14.23908N<br>04.296598E    | 09.01.2017      | Highly evaporated, dark brown pond, lower in the 7DA10 terrace system                           |                      | 100         |                                      | 33.4                       | n.d.  | n.d.   | n.d.      | n.d.     | 70                        | 0.580 | X                |                     |                |                             |         |      |   | Y |   |
|                                       | 7DA12              | 14.240136N<br>04.29675E    | 10.01.2017      | Active chimney (nearby 2016 site DAL6)                                                          |                      | 100         |                                      | 108.3                      | 0.47  | n.d.   | n.d.      | n.d.     | 43.0                      | n.d.  | X                |                     |                |                             |         |      |   |   |   |
|                                       | 7DA13-w1           | 14.235495N<br>04.298135E   | 11.01.2017      | Hydrothermal fluid from big grey active chimney                                                 |                      | 100         |                                      | 103.6                      | n.d.  | n.d.   | n.d.      | n.d.     | 35.0                      | 0.723 | X                |                     |                |                             |         |      |   |   |   |
|                                       | 7DA13-s2           | 14.235495N<br>04.298135E   | 11.01.2017      | Grey, hard salt fragments at the bottom of chimney 7DA13                                        | X                    |             |                                      | n.a.                       | n.a.  | n.a.   | n.a.      | n.a.     | n.a.                      | n.d.  |                  | X                   | X              |                             |         |      |   |   |   |
|                                       | 7DA14              | 14.23798N<br>04.298428E    | 12.01.2017      | Central pond in active group of geothermal ponds. Green color                                   |                      | 50          | 675                                  | 39.7                       | -0.51 | 2.4    | 0.15      | 382      | 40                        | 0.748 | X                | X                   | X              |                             |         |      |   |   |   |
|                                       | 7DA15-s            | 14.241427N<br>04.297727E   | 13.01.2017      | Green/yellow sediment near the "chocolate formation" CH-F                                       | X                    |             |                                      | n.a.                       | n.a.  | n.a.   | n.a.      | n.a.     | n.a.                      | n.d.  |                  | X                   | X              |                             |         |      |   |   |   |
| <b>Yellow Lake (Geet Ale)</b>         |                    |                            |                 |                                                                                                 |                      |             |                                      |                            |       |        |           |          |                           |       |                  |                     |                |                             |         |      |   |   |   |
|                                       | YL1                | 14.213574N<br>04.32128E    | 19.01.2016      | Yellow Lake bubbling water, yellow-orange color, oily texture, smell of organics-containing gas | X                    | 50          | 400                                  | 40.6                       | 1.88  | 6.6    | 0.37      | 447.1    | >50                       | n.d.  | X                | X                   | X              |                             | Y       | X    |   |   |   |
|                                       | YL2                | 14.213648N<br>04.321188E   | 19.01.2016      | Yellow Lake bubbling water - nearby spot (few meters away)                                      |                      | 50          | 400                                  | 39.5                       | 1.88  | 5.4    | 0.35      | 419.3    | 51.0                      | n.d.  | X                | X                   | X              |                             | Y       |      |   |   |   |
|                                       | YL3-01-w           | 14.213598N<br>04.320748E   | 19.01.2016      | Water from salt/sediment volcano                                                                |                      |             | 400                                  | 37.1                       | n.d.  | n.d.   | n.d.      | n.d.     | >50                       | 0.319 |                  | X                   | X              |                             | Y       | X    |   |   |   |
|                                       | YL3-01-s           | 14.213598N<br>04.320748E   | 19.01.2016      | Salty deposits from bubbling salt/sediment volcano - reddish color                              | X                    |             |                                      | 37.1                       | n.a.  | n.a.   | n.a.      | n.a.     | n.a.                      | n.d.  |                  | X                   | X              |                             |         |      |   |   |   |
|                                       | YL4-01             | 14.21386N<br>04.321482E    | 19.01.2016      | Salt crust on top of sediment at the further upper rim of Yellow Lake                           | X                    |             |                                      | n.a.                       | n.a.  | n.a.   | n.a.      | n.a.     | n.a.                      | n.d.  |                  | X                   | X              |                             |         |      |   |   |   |
|                                       | 7YL-w1             | 14.213574N<br>04.32128E    | 12.01.2017      | Water from the Yellow Lake                                                                      |                      | 150         | 5000                                 | 37.4                       | 1.52  | 11.5   | 0.63      | 462.2    | >50                       | 0.261 | X                |                     |                |                             |         |      | X | X |   |
|                                       | 7YL-w2             | 14.213648N<br>04.321188E   | 12.01.2017      | Water from a mid-sized pond near the Yellow Lake, strong smell of organics, dead birds          |                      | 200         |                                      | 33.8                       | 2.40  | 4.4    | 0.20      | 310.3    | 70                        | 0.467 | X                |                     |                |                             |         |      | X |   | X |
|                                       | 7YL-w3             | 14.213598N<br>04.320748E   | 12.01.2017      | Water from salt mud volcano (YL3 in 2016)                                                       |                      | 100         |                                      | 35.9                       | 1.37  | 5.1    | 0.32      | 349.3    | 80                        | n.d.  | X                |                     |                |                             |         |      | X |   |   |
|                                       | 7YL-s1             | 14.213574N<br>04.32128E    | 12.01.2017      | Salt crust from dried area in Yellow Lake                                                       | X                    |             |                                      | n.a.                       | n.a.  | n.a.   | n.a.      | n.a.     | n.a.                      | n.d.  |                  | X                   | X              |                             |         |      |   |   |   |
|                                       | 7YL-s2             | 14.213648N<br>04.321188E   | 12.01.2017      | Pinkish salt forming ripple marks on the rim of the Yellow Lake                                 | X                    |             |                                      | n.a.                       | n.a.  | n.a.   | n.a.      | n.a.     | n.a.                      | n.d.  |                  | X                   | X              |                             |         |      |   |   |   |
|                                       | 7YL-s3             | 14.213598N<br>04.320748E   | 12.01.2017      | Salt fragments from rim of 7YL-w2                                                               | X                    |             |                                      | n.a.                       | n.a.  | n.a.   | n.a.      | n.a.     | n.a.                      | n.d.  | X                | X                   | X              |                             |         |      |   |   |   |
|                                       | 7YL-s4             | 14.2136063N<br>04.3212611E | 12.01.2017      | Reddish salt/sediment from salt mud volcano                                                     | X                    |             |                                      | n.a.                       | n.a.  | n.a.   | n.a.      | n.a.     | n.a.                      | n.d.  |                  | X                   | X              |                             |         |      |   |   |   |
| <b>Black Lake and surroundings</b>    |                    |                            |                 |                                                                                                 |                      |             |                                      |                            |       |        |           |          |                           |       |                  |                     |                |                             |         |      |   |   |   |
|                                       | PSB1               | 14.221732N<br>04.28582E    | 19.01.2016      | Reddish salt and water from pond close to Black Lake                                            |                      | 50          |                                      | 40.6                       | 2.63  | n.a.   | n.a.      | n.a.     | 62.0                      | 0.334 |                  | X                   | X              |                             | XY      |      |   |   |   |
|                                       | PSB2               | 14.221788N<br>04.285713E   | 19.01.2016      | Yellowish salt and water from pond close to Black Lake                                          |                      | 50          |                                      | 40.6                       | 2.50  | n.a.   | n.a.      | n.a.     | 58.0                      | 0.345 |                  | X                   | X              |                             | XY      |      |   |   |   |
|                                       | PSB3               | 14.22173N<br>04.28582E     | 19.01.2016      | Orange salt and water from pond between Black Lake and camp site                                |                      | 50          |                                      | n.d.                       | n.d.  | n.a.   | n.a.      | n.a.     | 34.0                      | 0.722 |                  |                     |                |                             |         | XY   | X |   |   |
|                                       | PSB4               | 14.22173N<br>04.28582E     | 22.01.2016      | Warm red pond with acid emissions                                                               |                      | 50          |                                      | 40.0                       | 3.50  | n.a.   | n.a.      | n.a.     | 38.0                      | 0.711 |                  |                     |                |                             |         |      | X | X |   |
|                                       | BL2                | 14.221842N<br>04.286173 E  | 19.01.2016      | Black Lake bischofite-enriched water, very high viscosity                                       |                      | 25          |                                      | n.a.                       | n.a.  | n.a.   | n.a.      | n.a.     | n.a.                      | n.d.  |                  | X                   |                |                             |         |      |   |   |   |
|                                       | BL / BL1-02 / BL-w | 14.22182N<br>04.28620E     | 19.01.2016      | Black Lake bischofite-enriched water, very high viscosity                                       |                      | 50          | 150                                  | 70.6                       | 3.50  | n.a.   | n.a.      | n.a.     | 0.319                     | n.d.  | X                | X                   | X              |                             | Y       |      |   |   |   |
|                                       | BL6-01             | 14.22211N<br>04.28805E     | 24.01.2016      | Black fluid from chimney in very active young geothermal formation, black dome area             |                      | 15          |                                      | 110.0                      | 4.40  | n.d.   | n.d.      | n.d.     | n.d.                      | n.d.  |                  |                     |                |                             |         |      | Y |   |   |
|                                       | 7BL-w1             | 14.22182N<br>04.28620E     | 10.01.2017      | Black Lake bischofite-enriched water from surface                                               |                      | 150         |                                      | 60.1                       | 2.57  | 2.8    | 0.11      | 226.9    | 76                        | 0.322 | X                |                     |                |                             | X       | X    |   |   |   |
|                                       | 7BL-w2             | 14.22182N<br>04.28620E     | 10.01.2017      | Black Lake bischofite-enriched water, 3 m depth                                                 |                      | 100         |                                      | n.a.                       | n.a.  | n.a.   | n.a.      | n.a.     | n.a.                      | n.d.  | X                |                     |                |                             | X       | Y    |   |   |   |
| <b>Salt plain at Dallol dome base</b> |                    |                            |                 |                                                                                                 |                      |             |                                      |                            |       |        |           |          |                           |       |                  |                     |                |                             |         |      |   |   |   |
|                                       | PS                 | 14.2250194N<br>04.288900E  | 19.01.2016      | Salt pan fragment between the Dallol dome and Black Lake, rehydrated with sterile spring water  | X                    | 100         | 30                                   | n.a.                       | n.a.  | n.a.   | n.a.      | n.a.     | n.a.                      | n.d.  |                  | X                   | X              |                             | X       | X    | X | X | X |
|                                       | PS3                | 14.22912N<br>04.297935E    | 19.01.2016      | Water from salt shallow, hydrothermally influenced, pond at the dome base                       |                      | 150         | 950                                  | 29.3                       | 4.21  | n.d.   | n.d.      | n.d.     | 20.0                      | n.d.  | X                | X                   | X              |                             | XY      | X    |   |   |   |
| <b>Lake Assale (Lake Karum)</b>       |                    |                            |                 |                                                                                                 |                      |             |                                      |                            |       |        |           |          |                           |       |                  |                     |                |                             |         |      |   |   |   |
|                                       | Ass                | 14.089567N<br>04.348583E   | 23.01.2016      | Water from Lake Assale (Karum), overflowed towards the North of the Danakil Depression          |                      |             | 8000                                 | 26.2                       | 6.68  | 53.0   | 4.30      | 97.7     | 20.0                      | n.d.  |                  | X                   | X              |                             | X       |      |   |   |   |
|                                       | 8Ass               | 14.089567N<br>04.348583E   | 15.01.2018      |                                                                                                 |                      |             |                                      |                            |       |        |           |          |                           |       |                  |                     |                |                             |         |      |   |   |   |



**Table S2. Chemical composition of samples from the multi-extreme area of Dallol.** For details about chemical analyses, see Methods. Data about organic compounds identified in Dallol samples are listed in Supplementary Data S1.

| Element | Liquid samples        |           |          |          |           |          |           |          |          |          |          |          |          |          |          |          |          |           |           |           |           |           |           |           |           |          |          |           |           |      |
|---------|-----------------------|-----------|----------|----------|-----------|----------|-----------|----------|----------|----------|----------|----------|----------|----------|----------|----------|----------|-----------|-----------|-----------|-----------|-----------|-----------|-----------|-----------|----------|----------|-----------|-----------|------|
|         | Concentration (mg/ml) |           |          |          |           |          |           |          |          |          |          |          |          |          |          |          |          |           |           |           |           |           |           |           |           |          |          |           |           |      |
| Cl      | 105190                | 111510    | 22610    | 99430    | 126750    | 123950   | 136920    | 170690   | 144790   | 201890   | 192280   | 179610   | 145770   | 170150   | 191470   | 161980   | 172310   | 194550    | 208200    | 220160    | 285390    | 378080    | 283480    | 252000    | 325980    | 146280   | 146110   | 230440    | 248886    |      |
| Na      | 93120.36              | 105537.04 | 85029.17 | 81641.76 | 107204.75 | 96246.84 | 114638.67 | 99699.19 | 54954.80 | 51558.63 | 56742.29 | 59663.51 | 64186.60 | 69668.23 | 87876.56 | 85356.59 | 61908.40 | 1764.03   | 1541.54   | 1607.32   | 2616.01   | 2375.56   | 1441.97   | 5149.17   | 1652.79   | 93924.71 | 89081.01 | 144416.34 | 112833.19 |      |
| Ca      | 2263.99               | 2867.06   | 2788.01  | 3388.86  | 1055.45   | 2390.61  | 3059.76   | 7937.79  | 6169.13  | 4301.43  | 4767.66  | 3892.18  | 6084.12  | 3774.66  | 1158.84  | 6123.51  | 6707.38  | 13436.28  | 8071.31   | 8306.92   | 163132.50 | 192095.04 | 175942.77 | 111085.94 | 162942.51 | 20316.50 | 6929.85  | 4037.16   | 23148.69  |      |
| Mg      | 3764.86               | 4550.75   | 4387.41  | 6127.92  | 4538.48   | 6269.98  | 6268.84   | 9790.36  | 6348.22  | 6440.81  | 7206.49  | 5872.36  | 4249.59  | 3099.97  | 3131.56  | 2123.95  | 5260.42  | 145295.05 | 108652.70 | 112683.58 | 53922.80  | 60599.66  | 41427.89  | 37276.85  | 42199.86  | 10953.71 | 1914.20  | 1778.91   | 4148.39   |      |
| Fe      | 26445.16              | 33578.06  | 32990.09 | 4030.37  | 32940.60  | 41621.88 | 40293.36  | 46182.85 | 29064.79 | 45206.84 | 47342.72 | 39815.45 | 23675.95 | 23107.07 | 26107.32 | 5337.40  | 24115.73 | 2719.04   | 1505.35   | 1488.73   | 91.65     | 74.52     | 81.98     | 418.42    | 324.10    | 0.00     | 2.18     | 0.00      | 0.00      |      |
| K       | 9047.00               | 17096.11  | 16445.10 | 22355.01 | 16684.14  | 22301.91 | 21746.24  | 28073.69 | 17451.30 | 23683.71 | 24845.93 | 21539.29 | 13469.45 | 12000.32 | 12859.23 | 4421.73  | 14975.34 | 820.22    | 2323.18   | 2213.50   | 6186.46   | 4735.97   | 3834.52   | 24950.94  | 4617.63   | 7047.53  | 4737.88  | 2729.60   | 4759.99   |      |
| S       | 2027                  | 2077      | 2529     | 2984     | 3479      | 3111     | 3070      | 1836     | 2306     | 1240     | 1180     | 861      | 1590     | 1112     | 1840     | 2240     | 1543     | 1646      | NO        | NO        | 2407      | 3092      | 690       | 410       | 450       | 1384     | 351      |           |           |      |
| Mn      | 673.24                | 853.16    | 847.55   | 1141.84  | 858.47    | 1121.10  | 1129.63   | 1551.99  | 1023.92  | 1281.68  | 1343.48  | 1169.53  | 773.03   | 698.02   | 691.42   | 283.56   | 800.66   | 393.63    | 206.67    | 208.93    | 381.84    | 442.58    | 362.26    | 251.53    | 385.35    | 89.69    | 1.54     | 1.61      | 5.11      |      |
| Sr      | 68.06                 | 85.09     | 84.34    | 108.12   | 41.38     | 72.39    | 81.61     | 188.87   | 124.26   | 104.78   | 117.33   | 98.58    | 122.28   | 93.31    | 40.41    | 77.33    | 118.49   | 331.62    | 186.03    | 186.68    | 3042.29   | 3462.02   | 2885.69   | 2032.27   | 2747.67   | 439.81   | 159.94   | 98.52     | 372.42    |      |
| B       | 353.15                | 456.40    | 457.15   | 608.86   | 369.37    | 470.06   | 504.48    | 899.60   | 591.48   | 529.14   | 607.12   | 486.72   | 491.64   | 379.03   | 297.55   | 233.89   | 547.38   | 146.22    | 125.20    | 98.88     | 190.02    | 215.02    | 179.76    | 148.99    | 187.95    | 47.31    | 28.48    | 14.79     | 48.57     |      |
| Al      | 280.02                | 355.55    | 357.62   | 460.10   | 190.25    | 356.38   | 387.96    | 1113.20  | 722.04   | 544.99   | 614.45   | 516.50   | 689.24   | 354.23   | 132.78   | 297.94   | 641.44   | 0.71      | 0.00      | 0.72      | 0.89      | 0.00      | 0.00      | 0.00      | 0.00      | 1.32     | 0.00     | 0.03      |           |      |
| Si      | 21.71                 | 26.94     | 27.36    | 37.71    | 27.23     | 35.55    | 35.95     | 45.56    | 28.15    | 46.14    | 47.10    | 40.62    | 25.00    | 20.86    | 21.93    | 6.08     | 25.82    | 0.15      | 0.10      | 0.08      | 0.05      | 0.06      | 0.03      | 0.02      | 0.05      | 0.01     | 0.02     | 0.05      | 0.08      |      |
| V       | 30.58                 | 28.07     | 14.89    | 20.88    | 21.31     | 23.81    | 30.95     | 23.55    | 13.79    | 21.22    | 23.17    | 17.47    | 24.29    | 12.20    | 23.16    | 28.98    | 25.02    | 13.85     | 4.30      | 2.31      | 5.65      | 8.46      | 9.62      | 0.00      | 8.15      | 9.30     | 10.87    | 3.00      | 11.12     |      |
| P       | 16.50                 | 27.10     | 29.26    | 33.31    | 14.99     | 14.65    | 14.31     | 52.04    | 23.41    | 56.09    | 40.18    | 28.93    | 14.28    | 26.25    | 24.02    | 4.07     | 11.22    | 0.00      | 3.01      | 2.05      | 0.00      | 0.00      | 2.45      | 0.76      | 1.11      | 0.00     | 1.56     | 6.88      | 7.81      |      |
| Li      | 10.92                 | 14.88     | 15.07    | 21.52    | 14.54     | 18.62    | 18.99     | 23.61    | 15.08    | 19.26    | 22.51    | 16.66    | 10.42    | 10.24    | 12.84    | 4.10     | 11.66    | 15.81     | 6.93      | 8.24      | 29.13     | 33.94     | 23.99     | 15.18     | 20.27     | 3.53     | 4.02     | 3.23      | 4.67      |      |
| Cu      | 31.27                 | 24.94     | 7.53     | 17.89    | 15.90     | 19.80    | 33.21     | 50.64    | 28.91    | 41.85    | 30.21    | 31.27    | 42.91    | 19.86    | 11.51    | 2.63     | 51.25    | 0.88      | 0.00      | 0.00      | 1.05      | 2.72      | 0.65      | 0.00      | 0.01      | 4.54     | 0.00     | 0.02      | 0.00      |      |
| Zn      | 52.31                 | 68.71     | 67.28    | 91.20    | 60.50     | 82.24    | 87.23     | 140.51   | 86.32    | 105.22   | 105.98   | 88.93    | 77.46    | 57.62    | 49.60    | 35.56    | 79.77    | 33.77     | 22.67     | 21.01     | 14.07     | 13.73     | 14.90     | 14.19     | 14.77     | 6.47     | 10.94    | 9.14      | 4.15      |      |
| Kr      | 0.00                  | 0.00      | 0.00     | 0.00     | 0.00      | 0.00     | 0.00      | 0.00     | 5.82     | 0.00     | 17.09    | 13.01    | 0.00     | 19.95    | 19.58    | 0.00     | 20.09    | 4.39      | 0.00      | 17.17     | 0.00      | 19.20     | 0.00      | 0.00      | 0.00      | 0.00     | 0.00     | 0.00      | 0.00      |      |
| Rb      | 14.74                 | 17.33     | 16.36    | 22.00    | 15.57     | 21.92    | 22.42     | 42.29    | 26.14    | 30.13    | 30.78    | 27.10    | 19.45    | 15.43    | 13.56    | 8.33     | 21.92    | 0.29      | 1.64      | 1.66      | 6.24      | 3.85      | 3.40      | 20.05     | 2.54      | 5.93     | 6.16     | 3.32      | 6.97      |      |
| Ba      | 5.84                  | 5.88      | 3.27     | 5.05     | 2.61      | 2.77     | 7.55      | 3.00     | 3.05     | 6.77     | 9.71     | 7.26     | 11.94    | 4.49     | 3.25     | 6.33     | 12.64    | 35.36     | 25.23     | 26.06     | 26.46     | 31.44     | 26.46     | 17.01     | 24.50     | 7.67     | 0.82     | 0.61      | 2.71      |      |
| Tl      | 1.73                  | 1.46      | 1.86     | 2.41     | 0.76      | 1.05     | 1.37      | 6.17     | 4.43     | 1.93     | 1.43     | 1.24     | 2.13     | 1.39     | 0.46     | 2.87     | 1.89     | 0.00      | 1.46      | 0.86      | 0.00      | 0.00      | 39.93     | 0.00      | 0.00      | 0.83     | 1.71     | 8.48      |           |      |
| Au      | 3.90                  | 34.93     | 12.83    | 7.89     | 4.56      | 3.01     | 2.04      | 0.00     | 0.00     | 0.00     | 0.00     | 0.00     | 0.00     | 0.00     | 0.00     | 0.00     | 0.00     | 4.29      | 0.00      | 3.62      | 2.59      | 0.00      | 0.00      | 0.00      | 0.00      | 0.00     | 0.00     | 0.00      | 0.00      |      |
| Ni      | 0.10                  | 10.48     | 0.20     | 11.60    | 0.02      | 11.14    | 12.20     | 0.53     | 0.34     | 0.35     | 0.51     | 0.39     | 11.29    | 10.95    | 0.00     | 2.46     | 0.33     | 0.84      | 0.00      | 0.00      | 0.18      | 0.14      | 0.07      | 0.00      | 0.04      | 0.09     | 0.00     | 0.03      | 0.08      |      |
| Cr      | 0.92                  | 1.19      | 1.14     | 1.37     | 0.69      | 1.12     | 1.37      | 3.05     | 1.98     | 1.77     | 1.94     | 1.62     | 1.78     | 1.11     | 0.69     | 0.68     | 1.60     | 0.00      | 0.00      | 0.00      | 0.00      | 0.00      | 0.00      | 0.00      | 0.01      | 0.00     | 0.02     | 0.03      | 0.02      |      |
| Se      | 0.00                  | 0.44      | 0.00     | 1.30     | 0.07      | 0.73     | 0.11      | 0.20     | 1.66     | 0.02     | 0.68     | 0.20     | 0.41     | 0.00     | 0.93     | 0.21     | 1.45     | 0.43      | 1.97      | 3.96      | 3.00      | 1.66      | 0.00      | 0.20      | 0.26      | 2.49     | 0.01     |           | 0.03      | 0.04 |
| Co      | 0.60                  | 0.73      | 0.77     | 1.15     | 0.19      | 0.90     | 1.00      | 1.89     | 1.22     | 2.08     | 2.51     | 2.13     | 0.93     | 0.90     | 0.06     | 0.36     | 1.37     | 0.00      | 0.01      | 0.01      | 0.06      | 0.07      | 0.05      | 0.02      | 0.06      | 0.32     | 0.02     | 0.01      | 0.01      |      |
| Sn      | 0.90                  | 0.80      | 0.31     | 0.51     | 0.47      | 0.44     | 0.69      | 0.84     | 0.48     | 0.61     | 0.51     | 0.46     | 0.63     | 0.48     | 0.37     | 0.04     | 0.60     | 0.00      | 0.00      | 0.00      | 0.00      | 0.00      | 0.00      | 0.00      | 0.00      | 0.00     | 0.00     | 0.00      | 0.00      |      |
| Ga      | 0.34                  | 0.57      | 0.43     | 0.61     | 0.34      | 0.43     | 0.55      | 1.13     | 0.64     | 0.61     | 0.75     | 0.69     | 0.21     | 0.05     | 0.32     | 0.24     | 0.41     | 0.00      | 0.02      | 0.00      | 0.01      | 0.02      | 0.01      | 0.00      | 0.03      | 0.00     | 0.00     | 0.00      | 0.00      |      |
| Pb      | 0.07                  | 0.21      | 0.17     | 0.00     | 0.46      | 0.29     | 0.33      | 0.01     | 0.00     | 0.33     | 1.15     | 0.06     | 0.31     | 1.33     | 0.64     | 0.00     | 0.97     | 0.50      | 0.51      | 0.10      | 0.11      | 0.00      | 0.13      | 0.03      | 0.00      | 0.00     | 0.20     | 0.20      |           |      |
| As      | 0.20                  | 0.15      | 0.08     | 0.15     | 0.28      | 0.15     | 0.07      | 1.84     | 0.86     | 0.83     | 0.42     | 0.51     | 0.49     | 0.38     | 0.75     | 0.04     | 0.21     | 0.02      | 0.05      | 0.00      | 0.00      | 0.06      | 0.00      | 0.00      | 0.00      | 0.00     | 0.00     | 0.00      | 0.00      |      |
| Cs      | 0.26                  | 0.31      | 0.32     | 0.42     | 0.28      | 0.39     | 0.41      | 0.82     | 0.53     | 0.53     | 0.56     | 0.46     | 0.37     | 0.27     | 0.23     | 0.18     | 0.40     | 0.06      | 0.07      | 0.08      | 0.07      | 0.06      | 0.06      | 0.16      | 0.07      | 0.02     | 0.01     |           | 0.03      |      |
| U       | 0.25                  | 0.34      | 0.33     | 0.46     | 0.34      | 0.38     | 0.38      | 0.65     | 0.39     | 0.58     | 0.57     | 0.52     | 0.58     | 0.37     | 0.36     | 0.12     | 0.41     | 0.00      | 0.00      | 0.01      | 0.01      | 0.07      | 0.03      | 0.02      | 0.00      | 0.01     |          |           | 0.03      |      |
| Ce      | 0.34                  | 0.42      | 0.39     | 0.41     | 0.10      | 0.24     | 0.34      | 0.77     | 0.59     | 0.36     | 0.30     | 0.25     | 0.53     | 0.45     | 0.09     | 0.45     | 0.69     | 0.02      | 0.02      | 0.02      | 0.08      | 0.10      | 0.05      | 0.02      | 0.06      | 0.04     | 0.00     |           |           |      |
| La      | 0.35                  | 0.45      | 0.39     | 0.48     | 0.12      | 0.26     | 0.39      | 0.75     | 0.53     | 0.40     | 0.37     | 0.31     | 0.51     | 0.47     | 0.11     | 0.29     | 0.63     | 0.02      | 0.02      | 0.01      | 0.05      | 0.06      | 0.05      | 0.01      | 0.03      | 0.03     | 0.00     |           |           |      |
| Yb      | 0.00                  | 0.00      | 0.00     | 0.00     | 0.00      | 0.00     | 0.00      | 0.00     | 0.00     | 0.00     | 0.79     | 0.00     | 0.00     | 0.00     | 0.00     | 0.00     | 0.03     | 0.00      | 0.00      | 0.00      | 0.00      | 0.28      | 0.00      | 0.00      | 1.56      | 1.49     | 0.00     |           |           |      |
| Sc      | 0.04                  | 0.16      | 0.20     | 0.22     | 0.04      | 0.13     | 0.13      | 0.76     | 0.47     | 0.19     | 0.19     | 0.11     | 0.43     | 0.23     | 0.13     | 0.16     | 0.25     | 0.00      | 0.00      | 0.03      | 0.01      | 0.04      | 0.01      | 0.04      | 0.01      | 0.02     | 0.00     | 0.01      |           |      |
| Th      | 0.01                  | 0.56      | 0.23     | 0.17     | 0.07      | 0.08     | 0.06      | 0.11     | 0.10     | 0.20     | 0.00     | 0.01     | 0.58     | 0.16     | 0.00     | 0.00     | 0.26     | 0.01      | 0.00      | 0.00      | 0.01      | 0.17      | 0.00      | 0.00      | 0.00      | 0.00     | 0.03     | 0.04      |           |      |
| Mo      | 0.11                  | 0.03      | 0.01     | 0.03     | 0.00      | 0.00     | 0.00      | 0.37     | 0.28     | 0.32     | 0.28     | 0.28     |          |          |          |          |          |           |           |           |           |           |           |           |           |          |          |           |           |      |

**Table S3. Chaotropicity, ionic strength and water activity for a selection of samples of the Dallol area.**

Chaotropicity and ionic strength values were calculated using Na, K, Mg, Ca, Fe chemistry data; water activity values were measured using a probe (see Methods). Known limits for life for each parameter are listed at the top of the table. Samples beyond that threshold for one or more of those parameters are shaded in grey.

|                                    |          | Chaotropicity<br>(kJ/kg) | Ionic strength<br>(mol/L) | Water activity<br>( $a_w$ ) |
|------------------------------------|----------|--------------------------|---------------------------|-----------------------------|
| Life threshold*                    |          | $\leq 87.3$              | $\leq 12.141$             | $\geq 0.585$                |
| Cave water                         | Gt       | n.d                      | n.d                       | 0,728                       |
|                                    | 7Gt      | -23,797                  | 4,751                     | 0,729                       |
|                                    | 8Gt      | -56,649                  | 6,873                     | 0,731                       |
| Lake Assale                        | 8Kar     | 7,103                    | 7,274                     | 0,718                       |
| Geothermally influenced Salt Plain | PS3      | 24,091                   | 7,138                     | n.d                         |
| Dallol dome hydrothermal pools     | DAL 4.00 | -17,874                  | 6,104                     | 0,719                       |
|                                    | DAL 4.0  | -18,712                  | 7,307                     | n.d                         |
|                                    | DAL 4A   | -9,607                   | 6,346                     | n.d                         |
|                                    | DAL 4D   | 2,137                    | 7,104                     | n.d                         |
|                                    | DAL 6A   | -23,966                  | 7,203                     | n.d                         |
|                                    | DAL 9A   | -7,774                   | 7,529                     | n.d                         |
|                                    | DAL 9C   | -16,148                  | 8,349                     | n.d                         |
|                                    | 7DAL4-W1 | 40,435                   | 6,314                     | 0,667                       |
|                                    | 7DAL4-W2 | 14,285                   | 5,383                     | 0,698                       |
|                                    | 7DAL7    | 19,642                   | 5,989                     | 0,694                       |
|                                    | 7DAL-N1  | 20,844                   | 6,472                     | 0,694                       |
|                                    | 7DAL-N2  | 11,013                   | 5,940                     | 0,698                       |
|                                    | 7DAL9    | 2,948                    | 5,176                     | 0,708                       |
|                                    | 7DAL10   | -7,456                   | 5,037                     | 0,714                       |
|                                    | 7DAL10-1 | n.d                      | n.d                       | <b>0,580</b>                |
|                                    | 7DAL12   | -20,574                  | 5,793                     | n.d                         |
| 7DAL13-W1                          | -20,132  | 4,785                    | 0,723                     |                             |
| 7DAL14                             | 7,544    | 5,307                    | 0,748                     |                             |
| Black Lake area pools              | PSBL1    | n.d                      | n.d                       | <b>0,334</b>                |
|                                    | PSBL2    | n.d                      | n.d                       | <b>0,345</b>                |
|                                    | PSBL3    | n.d                      | n.d                       | 0,722                       |
|                                    | PSBL4    | n.d                      | n.d                       | 0,711                       |
| Black Lake                         | BL       | <b>354,194</b>           | <b>19,155</b>             | <b>0,319</b>                |
|                                    | 7BL-W1   | <b>259,407</b>           | <b>14,206</b>             | <b>0,322</b>                |
|                                    | 7BL-W2   | <b>268,893</b>           | <b>14,721</b>             | n.d                         |
| Yellow Lake                        | YL1      | <b>492,064</b>           | <b>19,141</b>             | n.d                         |
|                                    | YL2      | <b>574,045</b>           | <b>22,085</b>             | n.d                         |
|                                    | YL3      | n.d                      | n.d                       | <b>0,319</b>                |
|                                    | 7YL-W1   | <b>495,013</b>           | <b>18,446</b>             | <b>0,261</b>                |
|                                    | 7YL-W2   | <b>328,920</b>           | <b>13,796</b>             | <b>0,467</b>                |
|                                    | 7YL-W3   | <b>466,640</b>           | <b>17,609</b>             | n.d                         |

\* Data from Hallsworth et al (2007) and Stevenson et al (2015 and 2017)

**Table S4. Sequence data and diversity measurements.** \*Contaminant sequences included sequences identified in negative controls and/or high similarity to human-associated bacteria; s.e., standard error. Eventual mitochondrial and chloroplast 16S rRNA gene sequences were also removed at this step.

| Sample name                  | Initial No. of merged reads | No. of high quality reads | No. of retained reads after chimera check | No. of retained reads after removing contaminants* | No. archaeal reads | No. OTUs | Diversity (Simpson index) | Evenness | Richness (Chao1) (s.e.) | No. of bacterial reads | No. OTUs | Diversity (Simpson index) | Evenness | Richness (Chao1) (s.e.) |
|------------------------------|-----------------------------|---------------------------|-------------------------------------------|----------------------------------------------------|--------------------|----------|---------------------------|----------|-------------------------|------------------------|----------|---------------------------|----------|-------------------------|
| <b>Prokaryotic sequences</b> |                             |                           |                                           |                                                    | <b>Archaea</b>     |          |                           |          |                         | <b>Bacteria</b>        |          |                           |          |                         |
| DAL4.0                       | 169949                      | 169648                    | 165257                                    | 4                                                  | 3                  | 2        | 0,44                      | 0,92     | 2 (0)                   | 1                      | 1        | 0,00                      | NA       | 1 (0)                   |
| DAL4A                        | 152469                      | 152298                    | 146065                                    | 5023                                               | 5023               | 2        | 0,00                      | 0,01     | 2 (0)                   | 0                      | 0        | 1,00                      | 0,00     | 0 (NA)                  |
| DAL4C                        | 126853                      | 126665                    | 123020                                    | 0                                                  | 0                  | 0        | 1,00                      | 0,00     | 0 (NA)                  | 0                      | 0        | 1,00                      | 0,00     | 0 (NA)                  |
| DAL4D                        | 125034                      | 124804                    | 120619                                    | 0                                                  | 0                  | 0        | 1,00                      | 0,00     | 0 (NA)                  | 0                      | 0        | 1,00                      | 0,00     | 0 (NA)                  |
| DAL6A                        | 234168                      | 233935                    | 224050                                    | 4314                                               | 4303               | 21       | 0,03                      | 0,03     | 35 (11)                 | 11                     | 4        | 0,45                      | 0,64     | 7 (4)                   |
| DAL8-01                      | 113894                      | 112383                    | 108675                                    | 6                                                  | 0                  | 0        | 1,00                      | 0,00     | 0 (NA)                  | 6                      | 2        | 0,28                      | 0,65     | 2 (0)                   |
| DAL8-02                      | 182460                      | 176331                    | 172030                                    | 2                                                  | 0                  | 0        | 1,00                      | 0,00     | 0 (NA)                  | 2                      | 2        | 0,50                      | 1,00     | 3 (2)                   |
| DAL8-03                      | 154815                      | 151700                    | 148869                                    | 41                                                 | 0                  | 0        | 1,00                      | 0,00     | 0 (NA)                  | 41                     | 4        | 0,34                      | 0,49     | 4 (0)                   |
| DAL9A                        | 132758                      | 131862                    | 126420                                    | 2                                                  | 0                  | 0        | 1,00                      | 0,00     | 0 (NA)                  | 2                      | 2        | 0,50                      | 1,00     | 3 (2)                   |
| DAL9C                        | 107108                      | 106589                    | 104746                                    | 0                                                  | 0                  | 0        | 1,00                      | 0,00     | 0 (NA)                  | 0                      | 0        | 1,00                      | 0,00     | 0 (NA)                  |
| 7DA7                         | 133151                      | 132970                    | 128002                                    | 1                                                  | 1                  | 1        | 0,00                      | NA       | 1 (0)                   | 0                      | 0        | 1,00                      | 0,00     | 0 (NA)                  |
| 7DA7-pp                      | 42089                       | 42043                     | 41253                                     | 2                                                  | 2                  | 2        | 0,50                      | 1,00     | 3 (2)                   | 0                      | 0        | 1,00                      | 0,00     | 0 (NA)                  |
| 7DA9                         | 158516                      | 158249                    | 152576                                    | 1821                                               | 1                  | 1        | 0,00                      | NA       | 1 (0)                   | 0                      | 0        | 1,00                      | 0,00     | 0 (NA)                  |
| 7DA9-pp                      | 217467                      | 217096                    | 192709                                    | 2                                                  | 0                  | 0        | 1,00                      | 0,00     | 0 (NA)                  | 2                      | 1        | 0,00                      | NA       | 1 (0)                   |
| 7DA10                        | 213263                      | 212784                    | 205528                                    | 1                                                  | 1                  | 1        | 0,00                      | NA       | 1 (0)                   | 0                      | 0        | 1,00                      | 0,00     | 0 (NA)                  |
| 7DA10-pp                     | 44566                       | 44540                     | 40224                                     | 62                                                 | 0                  | 0        | 1,00                      | 0,00     | 0 (NA)                  | 62                     | 2        | 0,03                      | 0,12     | 2 (0)                   |
| 7DA14                        | 168809                      | 168500                    | 162187                                    | 2096                                               | 2094               | 5        | 0,01                      | 0,02     | 5 (0)                   | 2                      | 2        | 0,50                      | 1,00     | 3 (2)                   |
| 7DA14-pp                     | 82248                       | 82170                     | 71068                                     | 471                                                | 345                | 30       | 0,94                      | 0,89     | 32 (3)                  | 126                    | 7        | 0,69                      | 0,72     | 7 (0)                   |
| 7DA2-01                      | 33880                       | 33832                     | 33711                                     | 45                                                 | 31                 | 5        | 0,68                      | 0,82     | 5 (0)                   | 14                     | 7        | 0,83                      | 0,94     | 9 (3)                   |
| 7DA4-s                       | 103418                      | 103261                    | 102476                                    | 1492                                               | 1490               | 13       | 0,81                      | 0,69     | 15 (3)                  | 2                      | 2        | 0,50                      | 1,00     | 3 (2)                   |
| 7DA5-s                       | 184910                      | 184641                    | 180701                                    | 5243                                               | 3208               | 22       | 0,91                      | 0,82     | 32 (10)                 | 2035                   | 19       | 0,84                      | 0,78     | 19 (0)                  |
| 7DA9-s                       | 130399                      | 130259                    | 129730                                    | 261                                                | 212                | 8        | 0,72                      | 0,70     | 9 (1)                   | 49                     | 1        | 0,00                      | NA       | 1 (0)                   |
| 7DA13-s                      | 100425                      | 100280                    | 99550                                     | 298                                                | 298                | 7        | 0,66                      | 0,67     | 7 (0)                   | 0                      | 0        | 1,00                      | 0,00     | 0 (NA)                  |
| 7DA15-s                      | 143741                      | 143552                    | 142694                                    | 12589                                              | 12460              | 11       | 0,06                      | 0,08     | 11 (0)                  | 129                    | 2        | 0,48                      | 0,97     | 2 (0)                   |
| YL1                          | 226774                      | 226389                    | 217444                                    | 42                                                 | 1                  | 1        | 0,00                      | NA       | 1 (0)                   | 41                     | 4        | 0,30                      | 0,43     | 5 (2)                   |
| 7YL                          | 178284                      | 177903                    | 172455                                    | 1770                                               | 1302               | 13       | 0,57                      | 0,47     | 13 (0)                  | 468                    | 7        | 0,74                      | 0,76     | 7 (0)                   |
| 7YL-pp                       | 65597                       | 65556                     | 62547                                     | 0                                                  | 0                  | 0        | 1,00                      | 0,00     | 0 (NA)                  | 0                      | 0        | 1,00                      | 0,00     | 0 (NA)                  |
| YL2                          | 153107                      | 152918                    | 144028                                    | 2                                                  | 2                  | 1        | 0,00                      | NA       | 1 (0)                   | 0                      | 0        | 1,00                      | 0,00     | 0 (NA)                  |
| YL3-01w                      | 188511                      | 188312                    | 172260                                    | 126                                                | 0                  | 0        | 1,00                      | 0,00     | 0 (NA)                  | 126                    | 3        | 0,03                      | 0,08     | 4 (2)                   |
| YL3-01s                      | 232822                      | 232611                    | 210691                                    | 3                                                  | 0                  | 0        | 1,00                      | 0,00     | 0 (NA)                  | 3                      | 2        | 0,44                      | 0,92     | 2 (0)                   |
| 7YL-s3                       | 158645                      | 158488                    | 157145                                    | 979                                                | 898                | 15       | 0,86                      | 0,83     | 15 (0)                  | 81                     | 4        | 0,07                      | 0,14     | 7 (4)                   |
| 7YL-s4                       | 86468                       | 86366                     | 85180                                     | 207                                                | 157                | 4        | 0,60                      | 0,76     | 4 (0)                   | 50                     | 2        | 0,08                      | 0,24     | 2 (0)                   |
| YL4.01                       | 200889                      | 200588                    | 191536                                    | 10711                                              | 10691              | 2        | 0,00                      | 0,00     | 2 (0)                   | 20                     | 3        | 0,27                      | 0,47     | 3 (0)                   |
| 7YL-s1                       | 124032                      | 123877                    | 122505                                    | 36177                                              | 36016              | 39       | 0,79                      | 0,50     | 39 (0)                  | 161                    | 6        | 0,79                      | 0,91     | 6 (0)                   |
| 7YL-s2                       | 85188                       | 85072                     | 84444                                     | 668                                                | 547                | 10       | 0,75                      | 0,70     | 10 (0)                  | 121                    | 5        | 0,71                      | 0,83     | 5 (0)                   |
| BL2                          | 76395                       | 76209                     | 73977                                     | 12                                                 | 0                  | 0        | 1,00                      | 0,00     | 0 (NA)                  | 12                     | 6        | 0,78                      | 0,91     | 8 (3)                   |
| Blw                          | 227966                      | 227636                    | 218708                                    | 0                                                  | 0                  | 0        | 1,00                      | 0,00     | 0 (NA)                  | 0                      | 0        | 1,00                      | 0,00     | 0 (NA)                  |
| 7BLw1                        | 177297                      | 177131                    | 171404                                    | 3                                                  | 0                  | 0        | 1,00                      | 0,00     | 0 (NA)                  | 3                      | 1        | 0,00                      | NA       | 1 (0)                   |
| 7BLw2                        | 158986                      | 158630                    | 151304                                    | 1                                                  | 0                  | 0        | 1,00                      | 0,00     | 0 (NA)                  | 1                      | 1        | 0,00                      | NA       | 1 (0)                   |
| PSBL1                        | 127518                      | 127100                    | 124137                                    | 8                                                  | 0                  | 0        | 1,00                      | 0,00     | 0 (NA)                  | 8                      | 4        | 0,66                      | 0,88     | 5 (1)                   |
| PSBL2                        | 181312                      | 180562                    | 177286                                    | 5                                                  | 3                  | 2        | 0,44                      | 0,92     | 2 (0)                   | 2                      | 1        | 0,00                      | NA       | 1 (0)                   |
| PS3                          | 150482                      | 149968                    | 146028                                    | 146028                                             | 118980             | 291      | 0,88                      | 0,56     | 313 (7)                 | 26537                  | 123      | 0,96                      | 0,56     | 138 (11)                |
| PS                           | 304190                      | 303656                    | 282495                                    | 282495                                             | 274013             | 602      | 0,94                      | 0,51     | 701 (22)                | 5893                   | 39       | 0,30                      | 0,51     | 50 (8)                  |
| ASS                          | 173226                      | 172959                    | 165299                                    | 165299                                             | 140633             | 1013     | 0,94                      | 0,59     | 1190 (33)               | 23963                  | 496      | 0,69                      | 0,59     | 544 (13)                |
| ASS-PJ                       | 314682                      | 314213                    | 288299                                    | 288299                                             | 244551             | 1349     | 0,94                      | 0,57     | 1441 (18)               | 39873                  | 859      | 0,88                      | 0,57     | 912 (12)                |
| GT                           | 303592                      | 303083                    | 288086                                    | 288086                                             | 274039             | 656      | 0,87                      | 0,53     | 755 (25)                | 14047                  | 173      | 0,91                      | 0,53     | 193 (11)                |
| 7GT                          | 71483                       | 71368                     | 64143                                     | 64143                                              | 59788              | 524      | 0,95                      | 0,57     | 735 (46)                | 4353                   | 147      | 0,92                      | 0,57     | 201 (22)                |
| 7Gt-pp                       | 235497                      | 235111                    | 172010                                    | 172010                                             | 132967             | 1495     | 0,97                      | 0,57     | 1565 (13)               | 39039                  | 227      | 0,77                      | 0,57     | 253 (10)                |
| GC                           | 198582                      | 198288                    | 189428                                    | 32807                                              | 30700              | 68       | 0,71                      | 0,40     | 80 (7)                  | 2107                   | 2        | 0,00                      | 0,01     | 2 (0)                   |
| GC2                          | 94053                       | 93926                     | 87922                                     | 16162                                              | 15575              | 64       | 0,83                      | 0,50     | 71 (5)                  | 587                    | 1        | 0,00                      | NA       | 1 (0)                   |
| 7CMcore                      | 135254                      | 135086                    | 133629                                    | 202                                                | 136                | 16       | 0,55                      | 0,50     | 19 (3)                  | 66                     | 1        | 0,00                      | NA       | 1 (0)                   |
| 7Gt2                         | 150640                      | 150409                    | 138429                                    | 14250                                              | 7334               | 33       | 0,64                      | 0,43     | 36 (4)                  | 6916                   | 18       | 0,64                      | 0,48     | 19 (1)                  |
| NEGATIVE CONTROL A           | 106471                      | 105571                    | 96569                                     | 94348                                              | 2876               | 19       | 0,69                      | 0,49     | 26 (7)                  | 91472                  | 351      | 0,97                      | 0,69     | 461 (36)                |
| NEGATIVE CONTROL B           | 149421                      | 148866                    | 140175                                    | 135739                                             | 2782               | 16       | 0,83                      | 0,72     | 17 (2)                  | 132957                 | 484      | 0,97                      | 0,72     | 555 (20)                |
| <b>Eukaryotic sequences</b>  |                             |                           |                                           |                                                    |                    |          |                           |          |                         |                        |          |                           |          |                         |
| 8Ass                         | 320243                      | 319549                    | 312333                                    | 307451                                             |                    | 306      | 0,68                      | 0,25     | 308 (2)                 |                        |          |                           |          |                         |
| Ass                          | 148963                      | 148396                    | 142049                                    | 140678                                             |                    | 122      | 0,65                      | 0,31     | 136 (7)                 |                        |          |                           |          |                         |
| PS                           | 83526                       | 83207                     | 82325                                     | 82316                                              |                    | 50       | 0,06                      | 0,04     | 55 (4)                  |                        |          |                           |          |                         |
| PS3                          | 87971                       | 87459                     | 86745                                     | 54                                                 |                    | 6        | 0,36                      | 0,46     | 6 (0)                   |                        |          |                           |          |                         |
| Gt                           | 15063                       | 14998                     | 14883                                     | 1795                                               |                    | 4        | 0,25                      | 0,34     | 4 (0)                   |                        |          |                           |          |                         |
| 8Gt                          | 57995                       | 57773                     | 56359                                     | 56269                                              |                    | 125      | 0,56                      | 0,23     | 125 (0)                 |                        |          |                           |          |                         |

**Table S5. Mineral phases observed by SEM-EDX in precipitates of typical abiotic morphology and**

**'biomorphs'**. Biomorphs correspond to rounded-shaped crystalline morphs resembling cell structures (cocci, rods) and compatible with cellular sizes. Observed dominant phases are highlighted in bold

| Site                    | Samples                                                                                                             | Mineral phases                                                  |                                                                                                                                                                                       |
|-------------------------|---------------------------------------------------------------------------------------------------------------------|-----------------------------------------------------------------|---------------------------------------------------------------------------------------------------------------------------------------------------------------------------------------|
|                         |                                                                                                                     | Typical 'crystals'                                              | Abiotic 'Biomorphs'                                                                                                                                                                   |
| Cave water              | Gt2016, 7Gt, 8Gt_1                                                                                                  | Si, Ca sulfate, Fe-K sulfate, Al-Mg-Fe oxides, Fe and Ca oxides | Fe-Al silicates                                                                                                                                                                       |
| Lake Assale (Karum)     | 8Ass_2, 8Ass_3, 8Ass_4, 8Ass_6, 8Ass_7, 8Ass_8                                                                      | NaCl, Na-K-Mg chloride                                          | <b>Si biomorphs</b> (and encrustment)                                                                                                                                                 |
| Dallol dome (ponds)     | Dal4.0, 7DA7_07, DAL4D, 7DA9-P1, 7CA9_P1_3, 7DA7_04, 7DA7_05, 7DA7_06, 7DA9_P1_2, 7DA9_P1_5, 7DA9_P3_10, 7DA9_P3_12 | NaCl, Na-K-Mg chloride, Fe-K oxides(?), Ti oxides               | Sulfur biomorphs, <b>Si biomorphs</b> , S-rich Na-K silicates, locally S-rich Si biomorphs, <b>Fe phosphates</b> , Fe-K phosphate, Si biomorphs – enriched in Fe, Mg, K and locally S |
| Yellow lake             | YL1-03_4, 7YL_4, YL1-03_5, 7YL_6                                                                                    | Fe chloride, Mg chloride                                        | Si, CaCl <sub>2</sub> , Ca phosphate                                                                                                                                                  |
| Black lake area (ponds) | BLPS_05_5                                                                                                           | Mg-Fe-K chloride                                                | Mg chloride                                                                                                                                                                           |

**Other Supplementary Materials for this manuscript include the following:**

**Data S1.** (Table) Organic and ionic chromatography analysis of samples from the Dallol dome and surrounding area.

**Data S2.** (Table) Identification, phylogenetic affinity and relative abundance of prokaryotic OTUs.

**Data S3.** Identification, phylogenetic affinity and relative abundance of eukaryotic OTUs from Dallol area samples.

**Data S4.** Full tree of archaeal 16S rRNA gene fragments in Newick format.

**Data S5.** Full tree of bacterial 16S rRNA gene fragments in Newick format.

**Data S6.** Chemical maps obtained from energy dispersive X-ray spectrometry (EDXS) combined to SEM observations of cells and abiotic biomorphs observed in the Dallol area and Lake Assale (Karum).

**Data S7.** Energy dispersive X-ray spectrometry (EDXS) spectra of different structures observed in samples from the Dallol area.
